1 **A robust, semi-automated approach for counting cementum increments imaged**  
2 **with X-ray computed tomography**

3 Elis Newham<sup>1,2\*</sup>, Pamela G. Gill.<sup>3,4</sup>, Kate Robson Brown<sup>5,6</sup>, Neil J. Gostling<sup>7</sup>, Ian J.  
4 Corfe<sup>8,9</sup>, & Philipp Schneider<sup>1\*</sup>.

5 \* Corresponding author

6

- 7 1. Bioengineering Science Research Group, Faculty of Engineering and Physical  
8 Sciences, University of Southampton. University Road, Southampton, SO17 1BJ,  
9 United Kingdom.
- 10 2. School of Physics, University of Bristol. HH Wills Physics Laboratory, Bristol,  
11 BS8 1TL, United Kingdom.
- 12 3. School of Earth Sciences, University of Bristol. Wills Memorial Building,  
13 Queens Road, Bristol, BS8 1RJ, United Kingdom.
- 14 4. Department of Earth Sciences, Natural History Museum. Cromwell Road,  
15 London, SW7 5BD, United Kingdom.
- 16 5. Department of Mechanical Engineering, Queen's Building, University of Bristol,  
17 Bristol, UK.
- 18 6. Department of Anthropology and Archaeology, University of Bristol. 43  
19 Woodland Road, Bristol, BS8 1UU, United Kingdom.
- 20 7. Faculty of Environmental and Life Sciences, University of Southampton,  
21 Southampton, UK.
- 22 8. Developmental Biology Program, Institute of Biotechnology, University of  
23 Helsinki. Viikinkaari 5D, University of Helsinki, Helsinki, Finland.
- 24 9. Geological Survey of Finland, Espoo, Finland.

25

## 26 **Abstract**

27 Cementum, the tissue attaching mammal tooth roots to the periodontal ligament,  
28 grows appositionally throughout life, displaying a series of circum-annual incremental  
29 features. These have been studied for decades as a direct record of chronological  
30 lifespan. The majority of previous studies on cementum have used traditional thin-  
31 section histological methods to image and analyse increments. However, several  
32 caveats have been raised in terms of studying cementum increments in thin-sections.  
33 Firstly, the limited number of thin-sections and the two-dimensional perspective they  
34 impart provide an incomplete interpretation of cementum structure, and studies often  
35 struggle or fail to overcome complications in increment patterns that complicate or  
36 inhibit increment counting. Increments have been repeatedly shown to both split and  
37 coalesce, creating accessory increments that can bias increment counts. Secondly,  
38 identification and counting of cementum increments using human vision is subjective,  
39 and it has led to inaccurate readings in several experiments studying individuals of  
40 known age. Here, we have attempted to optimise a recently introduced imaging  
41 modality for cementum imaging; X-ray propagation-based phase-contrast imaging  
42 (PPCI). X-ray PPCI was performed for a sample of rhesus macaque (*Macaca mulatta*)  
43 lower first molars (n=10) from a laboratory population of known age. A new method  
44 for semi-automatic increment counting was then integrated into a purpose-built  
45 software package for studying cementum increments. Comparison with data from  
46 conventional cementochronology, based on histological examination of tissue  
47 sections, confirmed that X-ray PPCI reliably records cementum increments.  
48 Validation of the increment counting algorithm suggests that it is robust and provides  
49 accurate estimates of increment counts. In summary, we show that our new increment  
50 counting method has the potential to overcome caveats of conventional

51 cementochronology approaches, when used to analyse 3D images provided by X-ray  
52 PPCI.

53

## 54 **1. Introduction**

55 Mammalian teeth comprise three principal mineralised tissues: enamel, dentine and  
56 cementum. Each tissue provides its own record of growth via incremental patterns  
57 observed using thin-section histology that track periodic changes in their growth rates.  
58 Development of enamel and dentine is largely truncated after the maturation of the  
59 tooth. However, cementum grows continuously throughout life and provides a more  
60 complete record of an individual's life history (Klevezal, 1996). Incremental features  
61 found in cementum are well understood to have a circum-annual periodicity, with one  
62 thick translucent increment, and one thin opaque increment formed every year (when  
63 viewed in thin-section under transmitted light microscopy; Fig. 1). These contrasting  
64 opacities are hypothesised to be primarily due to seasonal changes in the  
65 mineralisation rates of the cementum hydroxyapatite matrix. Cementum is composed  
66 of bundles of collagen fibres emanating from the both the cementum itself (intrinsic  
67 fibres), or from the periodontal ligament or PDL (extrinsic 'Sharpey's' fibres),  
68 wrapped within a hydroxyapatite matrix. Unfavourable growth seasons promote a  
69 reduction in the deposition rate of this matrix, while the mineralisation rate is  
70 unaffected. This produces ultra-mineralisation of thinner portions of cementum during  
71 these periods (Lieberman, 1993; Klevezal, 1996; though see Stock et al 2017 and  
72 Dean et al 2018 for mineral distribution mapping studies that suggest higher mineral  
73 densities in wider, not narrower, cementum increments).

74 The proportion of collagen fibres emanating from either the cementum or the  
75 PDL defines the two major cementum tissue types. Acellular extrinsic fibre

76 cementum (AEFC) contains predominantly Sharpey's fibres from the PDL. This  
77 tissue has the most regular periodicity and provides the most consistent growth record  
78 in the cementum. Cellular intrinsic fibre cementum (CIFC) contains only fibres  
79 originating from the cementum itself. This tissue grows more sporadically than AEFC  
80 with a less precise periodicity and is known to nucleate within regions of the tooth  
81 that undergo anomalously high occlusal forcing. As such, AEFC is usually the  
82 recommended cementum tissue for cementochronological studies (Naji et al., 2016  
83 and references within).

84         Several studies have questioned the accuracy, precision and reliability of  
85 current methods of imaging and analysing cementum increments (Renz and  
86 Radlanski, 2006; Kasetty et al., 2010). Cementum is a dynamic, biomechanically  
87 responsive tissue and increments are known to both split and coalesce, which can  
88 undermine confidence in their counts as an estimate of age at death. The  
89 overwhelming majority of previous studies have relied on thin-sectioning samples to  
90 image increments using light microscopy (Naji et al., 2016). This allows increments  
91 to be viewed at high spatial resolutions, and offers a range of optical (Stutz, 2002) and  
92 digital image processing (Lieberman et al., 1990; Wall-Scheffler and Foley, 2008)  
93 methods that filter and highlight increments to varying degrees. However, the  
94 destructive nature of thin-sectioning and the restrictive two-dimensional (2D)  
95 perspective offered by histological sections limit the understanding of the complex  
96 nature of cementum and its increments (Renz and Radlanski, 2006). There is a wide  
97 range in the reported accuracy (the proximity of estimated increment counts to  
98 known/true chronological age in years) and precision (repeatability and  
99 reproducibility between researchers) of increment counts (Lipsinic et al., 1986; Renz

100 and Radlanski, 2006; Obertová and Francken, 2009), despite generally high reported  
101 accuracy and precision across multiple studies (Naji et al., 2016).

102 Computer vision and image processing have been explored to aid human  
103 counting of cementum increments, and to overcome the need for human counting  
104 itself (Czermak et al., 2006; Klauenberg & Lagona, 2007). Peaks and troughs in  
105 cementum opacity or greyscale ‘luminance’ can be extracted along radial transects  
106 through the cementum from digital micrographs of thin-sections using image  
107 processing software and studied by using ‘Digital Cementum Luminance Analysis’  
108 (DCLA) (Wall-Scheffler and Foley, 2008) (Fig. 2a-b). Light increments are  
109 represented by distinct peaks in luminance values, and dark increments by distinct  
110 troughs in luminance values (Fig. 2b). These patterns are interpreted by either  
111 manually counting peaks and/or troughs, or through peak/trough detection algorithms  
112 (e.g. ‘Find peaks’ in ImageJ/Fiji; Schneider et al., 2012). This abstraction of  
113 increments to peaks and troughs offers a less subjective method for manually  
114 counting increments, compared to directly reading thin-section images (Fig. 2b).  
115 Further, the use of numerical greyscale values to distinguish neighbouring light and  
116 dark increments allows quantitative thresholds to be defined for distinguishing  
117 increments. These thresholds represent a specific greyscale value from which  
118 peaks/troughs representing light/dark increments must differ from either the last  
119 trough or peak (respectively), or from the mean value of greyscale for the transect  
120 under study, in order to be identified as a ‘genuine’ increment.

121 However, DCLA methods have so far relied upon *a priori* assumptions  
122 regarding the contrast in greyscale values caused by incrementation versus those  
123 caused by other sources such as image noise. The chosen threshold value for  
124 distinguishing increments in each DCLA method is specific to the image technique

125 and hence image data in the original study, and so may not be robustly applied to data  
126 from other imaging modalities or techniques, or to taxa that fail to meet the specified  
127 threshold specified in the original study. Thus, the next stage in DCLA development  
128 should focus on developing a more flexible strategy for distinguishing cementum  
129 increments based on relative instead of absolute greyscale distribution criteria.

130 3D imaging, such as high-resolution computed tomography (CT) using X-ray  
131 propagation-based phase-contrast imaging (PPCI) at synchrotron radiation (SR)  
132 sources, may overcome the limitations posed by counting cementum increments in  
133 histological thin-sections. SR CT has revolutionised the study of other hard tissue  
134 microstructures such as vascular and cellular networks in bone (Schneider et al.,  
135 2007; Schneider et al., 2009; Sanchez et al., 2012; Goggin et al., 2016; Núñez et al.,  
136 2017; Goring et al., 2019) or growth increments in enamel (Tafforeau et al., 2006,  
137 2007; Tafforeau and Smith, 2008; Le Cabec et al., 2015; Green et al., 2017). SR CT  
138 imaging of such tissues provides a 3D context to the study of internal structures at  
139 sub-micrometre levels, and, with high signal-to-noise ratio (SNR) and high contrast-  
140 to-noise ratios (CNRs), provides high levels of image quality. PPCI through SR CT  
141 has recently allowed increments to be followed through the cementum of the teeth of  
142 archaeological humans (Mani-Caplazi et al. 2017; Newham 2018; Le Cabec et al.,  
143 2018) and macaque monkeys and early mammal fossils (Newham 2018; Newham et  
144 al. 2020a,b), overcoming the limitations of 2D thin-section-based imaging. The study  
145 of Le Cabec et al. (2018) investigated a sample of human teeth from an archaeological  
146 population of known age at death, and reported high precision between counts  
147 performed by different observers, and for repeated counts performed by the same  
148 observer. However, although a strong correlation was found between age estimated by  
149 increment counts and known age, the accuracy (proximity of estimated age to known

150 age) of estimates fell from 2.5 years in individuals 20-29 years old to 28 years in  
151 individuals 60-89 years old (with counts consistently underestimating true age). The  
152 canines studied in Le Cabec et al. (2019) were not histologically thin-sectioned. On  
153 this account, it could not be determined whether the nature of the source of this  
154 inaccuracy was biological, diagenetic (chemical changes to the cementum changing  
155 and overprinting original increments), or technical (insufficient image contrast  
156 between increments due to similar material properties in terms of X-ray interactions  
157 and/or due to unsuitable imaging and/or CT reconstruction settings).

158         Here, we aim to optimise PPCI through SR CT for studying cementum  
159 increments in 3D, in comparison with the respective histological data in 2D. We will  
160 particularly assess the potential for overcoming the limitations identified in current  
161 approaches for counting cementum increments. As a second objective, we provide a  
162 validated, semi-automated and robust algorithm for user-independent counting of  
163 cementum increments.

164

## 165 **2. Materials and Methods**

### 166 *2.1. Teeth samples*

167 This study is focused on the analysis of the right lower first molars (m1) from a  
168 sample of 10 female Rhesus macaques (*Macaca mulatta*), raised under laboratory  
169 conditions and bred for biomedical research at the Primate Breeding Facility of Public  
170 Health England, Salisbury (UK) (Table 1). All animals used here were routinely  
171 monitored and checked for primate-borne diseases of risk to humans (including  
172 hepatitis B, herpes B and tuberculosis) and were humanely killed using an overdose  
173 of pentobarbital, under Home Office establishment licence 70-1707, due to being  
174 unfit for breeding or whole-animal scientific procedural use. No animal was killed for

175 the specific purpose of this study. Once the animals were killed, their lower jaws were  
176 mechanically dislocated and removed by Public Health England. Lower jaws were  
177 then freeze-stored at -20 °C prior to further tissue preparation. The studied sample  
178 was classed as Category B biological waste by the UK government. As no animal was  
179 sacrificed or harmed for the purpose of this study, no animal research ethics  
180 committee approval was needed.

181 To prepare specimens, lower jaws were first mechanically cleaned of soft  
182 tissue using surgical tools (scalpel, scissors and tweezers). The coronoid and angular  
183 processes were then removed using a handsaw. Once prepared, specimens were  
184 bathed in tap water in a sealed plastic container, which was stored in a fume cupboard  
185 for three weeks (21 days). This procedure was adopted to rot away the periodontal  
186 ligament and alveolar soft tissue that could not be mechanically removed. After three  
187 weeks, teeth were sufficiently loose within the jaw to be easily removed using  
188 surgical pliers. The left and right m1 teeth of all animals were fixed in 10%  
189 paraformaldehyde (PFA) solution for 10 days to minimise risk of infection.

190 Finally, the crowns of all teeth were removed using a Buehler IsoMet<sup>®</sup> Low  
191 Speed precision sectioning saw equipped with an Acuthin<sup>™</sup> blade (Buehler Ltd, Lake  
192 Bluff, IL, USA). Using the same saw, the anterior and posterior roots of each m1  
193 tooth were mechanically separated and mounted on 2 mm-thick carbon fibre rods  
194 (CR200600; Ripmax Ltd, Enfield, UK) cut to 1.5 cm length, using cyanoacrylate  
195 super glue.

196 Chronological age at death in years was known for each individual (Table 1).  
197 This data point, and the average age of replacement of lower m1 teeth for captive  
198 populations of *Macaca mulatta* (approximately 12-18 months; Bowen and Kock,  
199 1970) provided an expected increment count for each individual. However, a potential



200 variation of six months for m1 replacement necessitated the use of a minimum  
201 expected increment count, and a maximum expected increment count (one increment  
202 higher than the minimum expected count) (Table 1).

## 203 *2.2. X-ray PPCI of cementum*

204 PPCI for this study was performed during a three-day experiment at the TOMCAT  
205 beamline of the Swiss Light Source (SLS) (15-18 March 2016). The station at  
206 TOMCAT allows the user to control a series of key experimental settings, affecting  
207 the image quality of the resulting CT data (Kitchen et al., 2017; Zeller-Plumhoff et  
208 al., 2017). The effects of these experimental settings must be systematically assessed  
209 in order to achieve optimal experimental conditions for the specific purpose and  
210 required image quality of a study.

211 In a preliminary experiment, the cementum tissue of specimen 156 was imaged  
212 using X-ray PPCI through SR CT for a range of different experimental settings. Four  
213 key experimental settings (X-ray energy, exposure time, number of X-ray projections,  
214 and sample-to-detector distance) were individually varied according to Table 2, while  
215 all other experimental settings were fixed at an X-ray energy of 20 keV, a voxel size  
216 of 0.66  $\mu\text{m}$  and an exposure time of 150 ms for 1501 projections, at a sample-to-  
217 detector distance of 14.00 mm, which corresponds to a similar effective X-ray  
218 propagation distance of 13.99 mm (Zeller-Plumhoff et al., 2017) due to the parallel X-  
219 ray beam geometry at TOMCAT. The effects of changing experimental settings on  
220 image quality of cementum increments were characterised by the signal-to-noise ratio  
221 (SNR) and the contrast-to-noise ratio (CNR) as figure of merits. SNR quantifies the  
222 level of the image signal relative to the background noise. CNR is a useful measure  
223 for assessing image contrast between distinct structures, such as dark/light cementum  
224 increments.

225 Image quality measures for each experimental setting were calculated for 10  
226 CT slices, representing the same regions of the tooth root of 156 in each scan (Fig. 3).  
227 SNR was calculated as the ratio between the mean greyscale value (representing  
228 density) for a 150-pixel  $\times$  150-pixel region of interest (ROI) of cementum ( $\overline{g}_c$ ) and  
229 the standard deviation of a 150-pixel  $\times$  150-pixel sample of background (i.e. air) ( $\sigma_b$ )  
230 in each slice:

$$SNR = \frac{\overline{g}_c}{\sigma_b} \quad (1)$$

231 CNR was calculated as the difference of the mean greyscale values of the same ROIs  
232 of cementum ( $\overline{g}_c$ ) and air ( $\overline{g}_b$ ), respectively, divided by the pooled standard deviation,  
233 following the Pythagorean Theorem of Statistics ( $Var(X \pm Y) = Var(X) + Var(Y)$   
234 or  $\sigma^2(X \pm Y) = \sigma^2(X) + \sigma^2(Y)$  for independent random variables  $X$  and  $Y$ , with  $Var$   
235 and  $\sigma$  denoting the variance and standard deviation, respectively):

$$CNR = \frac{\overline{g}_c - \overline{g}_b}{[(\sigma_c^2 + \sigma_b^2)/2]^{1/2}}, \quad (2)$$

236 where  $\sigma_c$  and  $\sigma_b$  represent the standard deviations of cementum and background,  
237 respectively. Mean values of SNR and CNR were calculated from the values for these  
238 10 slices and compared between all experimental settings (Fig. 4 and Table 2).

239 Following this preliminary study, an X-ray energy of 20 keV and a sample-to-  
240 detector distance of 14 mm was chosen. This provided sufficient image contrast  
241 between cementum increments. For each scan, the exposure time was set to 150 ms,  
242 and 1501 projections were taken per scan. These settings provided sufficient image  
243 quality at scan times that allowed the entire sample to be imaged during our fixed-  
244 time experiment. The phase of each X-ray projection was retrieved through the  
245 Paganin single-distance non-iterative phase retrieval algorithm, (Paganin et al., 2002),  
246 implemented in-house at TOMCAT. The values of the imaginary part of the refractive

247 index  $\delta=3.7 \cdot 10^{-8}$  and the decrement of the real part of the refractive index  $\beta=1.7 \cdot 10^{-}$   
248  $^{10}$ , and hence the ratio  $\delta/\beta = 218$ , were fixed for all scans. The phase images were  
249 reconstructed using an in-house implementation of the Gridrec algorithm (Marone  
250 and Stampanoni, 2012) at TOMCAT. The resulting PPCI CT reconstructions were  
251 saved as 16-bit tiff stacks.

### 252 *2.3. Image processing: straightening and filtering*

253 Image processing of the raw data is often needed before digital image visualisation,  
254 segmentation and quantification. This can involve a wide range of image processing  
255 methods, the majority of which are based on the manipulation of 2D pixels and/or 3D  
256 voxels using mathematical operations (Nixon and Aguado, 2012). Here, we applied  
257 two principal image processing methods to individual CT slices: straightening and  
258 isolation of cementum, and directional filtering of cementum increments.

259 For circumferential structures such as cementum increments, it is often  
260 difficult to apply standard image processing tools and analyses without distorting  
261 results, due to complexities in their patterns and boundaries. Hence, 2D straightening  
262 algorithms are often applied in order to further analyse the data. We chose to use the  
263 ‘Straighten’ tool of the open source ImageJ/Fiji image analysis software (Schneider et  
264 al., 2012). This tool applies cubic-spline interpolation across a segmented midline of  
265 the feature of interest, which is defined by the user. Straightening is then performed  
266 using a series of non-linear cubic splines for an arbitrary number of pixels on either  
267 side of the midline that can be also be determined by the user. Here, we assigned this  
268 number on an individual basis for each dataset, based on the (radial) thickness of  
269 cementum being imaged, to ensure that all cementum, but no dentine, was included in  
270 the processed image (Fig. 5.a-b). This workflow was then repeated in a semi-  
271 automated fashion for all CT slices of each dataset following Newham et al. (2020a),

272 wherein the same midline coordinates and thickness of the segmentation was applied  
273 for as many slices as possible from the first slice of a dataset, before adjusting these  
274 parameters once they became suboptimal at several points further through the  
275 PPSRCT volume due to misalignment between the scanning and root axes.

276       Following straightening, cementum datasets were further processed using  
277 directional filtering in order to enhance contrast between increments (Fig. 5.d).  
278 Filtering is commonly used to suppress the contribution of unwanted signals such as  
279 noise, while preserving and enhancing the targeted signal or image contributions for  
280 the analysis in question (Freeman and Adelson, 1991). We used a custom MATLAB  
281 (R2016a; The MathWorks, Inc., Natick, MA, USA) tool called ‘SteerGauss’ (version  
282 1.0.0.0) developed and made freely available by Lanman (2006), in order to employ  
283 directional Gaussian filtering of straightened cementum images following Freeman  
284 and Adelson (1991). For directional Gaussian filtering, a Gaussian function for a set  
285 of 2D  $(x,y)$  Cartesian coordinates can be prescribed for any arbitrary orientation using  
286 a directional derivative operator that interpolates between two ‘basic’ Gaussian  
287 functions, directed at  $0^\circ$  and  $90^\circ$ , respectively. Straightened increments follow similar  
288 longitudinal paths, so a steerable filter can be used to select a single orientation of all  
289 increments in an image (Fig. 3.c-d). For the current study, the use of a directional  
290 Gaussian filter oriented at  $90^\circ$  to the  $x$ -axis has been shown to substantially enhance  
291 image contrast between straightened cementum increments (see Supplement, section  
292 1. ‘Image processing by directional filtering’)(Fig. 5).

#### 293 *2.4. Cementum increment counting algorithm*

294 The cementum increment counting algorithm developed here was designed to count  
295 cementum increments in a user-independent and semi-automated fashion, further  
296 developing the rationale proposed by DCLA for distinguishing individual increments

297 by using a cut-off point that greyscale peaks/troughs must differ by, in order to be  
298 counted as a genuine increment. Our algorithm employs population statistics (mean  
299 and standard deviation of greyscale values) to count increments, based on the unique  
300 distribution of greyscale values within each individual CT slice (see Supplement,  
301 section 2 ‘Robustness testing for increment counting algorithm’). As in DCLA, this  
302 method makes use of the average greyscale values along 10 pixel-thick transects through  
303 cementum (Fig. 2a). Adapting methods used in tribological surface profiling  
304 (Gadelmawla et al., 2002; Esfahani et al, 2018), individual transects are separated into  
305 five sections of equal length (Fig. 2b) (see Supplement, section 3 ‘Splitting of  
306 transects through the cementum’). PPCI SR CT datasets of cementum show an  
307 overarching reduction in greyscale (density) values from the cemento-dentine  
308 boundary to the outer-most cementum increment (Fig. 2a-b) (Newham 2020a,b).  
309 Therefore, the use of the mean greyscale value and its standard deviation for the entire  
310 transect, as opposed to local values for individual sections of the transect, may  
311 preclude the counting of genuine increments towards the outermost increment (as  
312 greyscale peaks/troughs are below the mean value), and counting of increments  
313 towards the cemento-dentine boundary (as greyscale peaks/troughs are above the  
314 mean value). The mean and standard deviation of greyscale values in each section is  
315 then calculated (Fig. 2b-d), and light-dark increment pairs are distinguished as peak-  
316 trough systems in greyscale that depart from the mean value beyond the local standard  
317 deviation in each section (Fig. 2c).

318 Most importantly, this new method for increment counting can be operated in  
319 a semi-automated fashion, following an algorithm implemented in the MATLAB  
320 statistical environment (see Appendix for MATLAB script). In MATLAB, each  
321 individual straightened and filtered cementum image is investigated along a series

322 of 1000 transects through the cementum chosen at random using a random number  
323 generator (Fig. 2a). For each transect, the distance across the transect that the first  
324 pixel above zero appears is saved, which gives the radial length of sampled  
325 cementum along the transect. Any transect that is less than the lower standard  
326 deviation of the saved lengths is then deselected and resampled until all transects  
327 fulfil the lower standard deviation of the original sample. Each transect is divided  
328 into five sections of equal length (Fig. 2b), and a cubic spline ('Smoothing spline'  
329 function in MATLAB) is fitted to the greyscale pattern captured within each  
330 section, in order to minimise the influence of image noise on peak/trough patterns  
331 (Martinez and Martinez, 2015) (Fig. 2b). For these five smoothed datasets, their  
332 mean greyscale value (red lines in Figure 2) is calculated. An upper 'cut-off' value  
333 (green lines in Figure 2) is then determined for each section as its mean greyscale  
334 value plus half the standard deviation of its greyscale values, and lower 'cut-off'  
335 value (blue lines in Figure 2) as the mean greyscale value minus half of the standard  
336 deviation. Two new datasets are then created for each section, the first comprised of  
337 only greyscale values above the mean, and the other of values below the mean (Fig.  
338 2c). The dataset comprising higher greyscale values thus consists solely of greyscale  
339 'peaks' (local apex in greyscale values), while the dataset comprising lower  
340 greyscale values consists solely of greyscale 'troughs' (local nadir in greyscale  
341 values) (Fig. 2c). The 'Findpeaks' tool (part of the default 'Signal processing  
342 toolbox' in MATLAB) is then used to identify peaks and troughs in their respective  
343 datasets (following multiplication with -1 to convert troughs into peaks) and  
344 calculate their difference from the mean greyscale value of that section. This allows  
345 peaks and troughs that extend beyond the top and bottom cut-off values  
346 (respectively) for each section to be identified, providing the first stage of

347 estimating increment and increment pair counts (Fig. 2b-d).

348       Following this first estimate of increment and increment pair counts, further  
349 steps are taken within the algorithm to ensure that ‘piggy-back’ features (secondary  
350 peaks/troughs along the ascending/descending limbs of genuine increment peaks  
351 and troughs) do not affect increment counts (Fig. 2). No peaks are counted that  
352 immediately proceed from the last respective peak; so only one peak is counted for  
353 every trough (in Fig. 2c. peaks i and ii are not counted). Also, no peak/trough  
354 system along the transect for which each feature is separated by less than three  
355 pixels along the transect (or 1.98  $\mu\text{m}$ ), are counted, to ensure that grey scale  
356 variations on a small scale do not influence increment counts (Fig. 2c peaks i and  
357 ii).

358       A final measure is taken to account for increments that are only partly  
359 captured inside a neighbouring set of sections along one transect (Fig. 2b-c.). As  
360 only the ascending/descending limb of such features would be captured in each  
361 section, they may not be detected as a peak/trough in greyscale in either section  
362 using the first stage of the increment counting algorithm, which defines peaks or  
363 troughs with reference to the two troughs or peaks surrounding them respectively. A  
364 second step is therefore undertaken to distinguish, measure and count these features  
365 based on their greyscale values relative to the upper and lower standard deviations  
366 of each neighbouring section (described in Supplement Section 4 ‘Accounting for  
367 increments split between two neighboring sections’). Once increment pair counts  
368 are estimated for the 1000 random transects, the mean and standard deviation are  
369 calculated, providing a final estimate of cementum increment pair count.

370       The robustness of the proposed algorithm was tested by applying it to a series  
371 of digital sine wave patterns of known increment number between five and 30.

372 Random noise at different degrees was applied to these patterns in a controlled  
373 manner by increasing their standard deviation along the y-axis (Fig. 6). Noise was  
374 increased incrementally by SNR decrements of 0.1; starting from a SNR of 0.9 and  
375 ending at an SNR of 0.1. For each SNR level, increments were counted for 30 sine  
376 wave patterns for each count between five and 30. Increment estimates were  
377 considered as accurate if the mean estimated count equalled the known increment  
378 number to an accuracy of  $\pm 0.5$ . Estimates were considered robust for each count as  
379 long as the standard deviation for the 30 counted sine wave patterns was  $< 1$ , as  
380 values above this may produce estimated increment counts of over 1 year  
381 above/below known/expected counts (see Supplement Section 2 ‘Robustness testing  
382 for increment counting algorithm’).

### 383 *2.7. Application of cementum increment counting algorithm*

384 The increment counting algorithm presented here was used to generate estimates of  
385 increment counts for straightened and filtered CT slices for each lower first molar  
386 specimen of the 10 *Macaca mulatta* individuals. We applied the cementum  
387 increment counting algorithm to 30 CT slices for each individual, representative of  
388 highest cementum increment contrast and quality for each individual (Naji et al.,  
389 2016). Each straightened and filtered CT dataset was examined by eye, in order to  
390 find the regions of highest increment contrast and minimum amounts of complexity  
391 in increment patterns (i.e. splitting and coalescence of increments). 1000 transects  
392 were plotted through the cementum in each CT slice, and increment pair counts  
393 were generated for each transect. The mean increment pair count for all 1000  
394 transects was then used as the estimated increment pair count for the slice, and the  
395 mean count of the 30 slices rounded to the nearest integer was defined as the  
396 estimated increment pair count for that *Macaca mulatta* individual.



397

### 398 **3. Results**

#### 399 *3.1. Optimisation of cementum imaging*

400 When the X-ray energy was changed in isolation, SNR became consistently lower  
401 with increasing X-ray energy, whereas CNR peaked at 20 keV, before steadily falling  
402 with increasing X-ray energy beyond this point (Fig. 4a). SNR and CNR steadily  
403 improved with increasing exposure time (Fig. 4b). SNR and CNR also improved with  
404 increased number of projections, although the relative increase in CNR was marginal  
405 between 3001 and 4501 projections (Fig. 4c). SNR steadily increased with larger  
406 sample-to-detector distances up to 60 mm (Fig. 4d). Whereas CNR steadily rose from  
407 14 mm sample-to-detector distance to a peak at 28 mm, it fell between a sample-to-  
408 detector distance of 28 mm and 100 mm (Fig. 4d).

409         The image quality of the dataset imaged at 28 mm sample-to-detector distance  
410 (Fig. 3c) represents an optimum in the trade-off between spatial resolution and  
411 contrast for our application. The smoothing inherent in the Paganin phase retrieval  
412 algorithm (Zeller-Plumhoff et al., 2017) flattens out increment boundaries and  
413 reduces noise, while (mean) greyscale differences are retained between light and dark  
414 increments to an extent that offers sufficient image contrast to identify individual  
415 cementum increments. For datasets created using smaller sample-to-detector distances  
416 (14 mm - 20 mm), high image contrast resulted between increments, but their  
417 boundaries were smoothed and less well defined (case Fig. 3b). For sample-to-  
418 detector distances above this, the increasing amounts of smoothing diminished the  
419 differences in greyscale values between light and dark increments such that by 100  
420 mm sample-to-detector distance, they were difficult to distinguish by eye (case Fig.  
421 3d). This can also be shown quantitatively by plotting greyscale values along transects

422 through the same region of cementum in each dataset (Fig. 3e) acquired at different  
423 sample-to-detector distances.

### 424 3.2. Cementum imaging results

425 Cementum was clearly visible in each CT dataset as an incremental tissue wrapping  
426 around the dentine of tooth roots and comprising a series of radial increments (Figs. 5  
427 and 7-8). The cementum could be distinguished from the dentine due to its  
428 significantly lower mean grey values, and the cemento-dentine boundary was marked  
429 by the characteristic tissues of the granular layer of Tomes and the high-density  
430 hyaline layer of Hopewell Smith (Fig. 7). Individual increments were clearly visible  
431 within the cementum and could be followed through the entire dataset, both  
432 transversely and longitudinally (Fig. 8).

433 Comparison between CT slices and histological thin-sections of the same  
434 regions of cementum (created using the method outlined in Newham et al. (2020a)  
435 and imaged using the method outlined in Supplement Section 5 ‘Thin-section  
436 Imaging’) suggests that both imaging techniques represent the same cementum  
437 increments (Fig. 7). Optical differences between increments in histological data were  
438 reflected as grey value differences in CT data. Thick, light increments in histological  
439 data corresponded to thick, light increments in CT data, and so absorbed a higher  
440 proportion of X-rays relative to thin, dark increments (Fig. 7). Volumetric CT data  
441 could further be used to help elucidate primary increments from accessory increments  
442 in several specimens. Complexities in increment patterns were witnessed  
443 intermittently in every *Macaca mulatta* individual, with individual increments  
444 splitting and coalescing to create apparent accessory increments. Following Newham  
445 et al. (2020a,b), individual increments could be mapped through the cementum tissue,  
446 and the same primary increments could be plotted through the entire scanned tissue

447 volume (Fig. 8) across these complexities, and distinguished from the accessory  
448 increments created. Therefore, regions that were confounded by splitting and  
449 coalescing of these increments could be distinguished and excluded for analysis of  
450 increment counts (Fig. 8). Also, cellular cementum, the tissue with the least  
451 chronological precision in its increment periodicity (Naji et al., 2016), could be  
452 distinguished from acellular cementum by the presence of cellular voids, and so could  
453 be avoided when identifying high-contrast regions of increments with a circum-  
454 annual periodicity (Fig. 7). These two factors, possible due to the entire coronal  
455 (crownward) third of the cementum tissue being imaged, led to the identification of  
456 the highest quality regions of circum-annual cementum increments for each specimen  
457 (Fig. 7).

### 458 *3.3. Validation of cementum increment counting algorithm*

459 Robustness tests for the proposed increment counting algorithm suggest that it is  
460 reliable for SNRs down to 0.2 (Fig. 5). For each simulated pattern of known  
461 increment number, the average value of 30 automated counts was identical to the  
462 known count for SNRs between 0.9-0.5. The upper/lower standard deviations of these  
463 samples did not exceed one integer above/below the known count (Fig. 6). Between  
464 SNR levels of 0.5-0.2, average automated counts only differed from known increment  
465 number by a value of one in a single sample (with a known increment number of  
466 eight). The standard deviations of automated counts exceed one integer above/below  
467 the known count for known increment counts of 22 and 28 (Fig. 6). SNRs of 0.1  
468 introduced more errors of between one and two in increment count when compared to  
469 the known increment number, and the automated count was outside the region of one  
470 standard deviations around the known increment number (Fig. 6).

471 When increments were algorithmically counted in our macaque data and

472 compared to expected counts for our sample based on known age, a Spearman's  $r$  of  
473 0.77 ( $p < 0.009$ ) and Kendall's  $\tau$  of 0.71 ( $p = 0.004$ ) suggest significant correlation  
474 between semi-automated increment pair counts and expected numbers of cementum  
475 increment pairs. The mean of the semi-automated increment pair counts for each  
476 *Macaca mulatta* individual either met the minimum or maximum expected count  
477 based on their known age or fell in-between the two for every sample, apart from the  
478 juvenile individual t46 whose mean estimated count was 0.5 years more than the  
479 maximum expected count (Table 1 and Fig. 9). Juvenile cementum has been  
480 previously shown to contain more complex incrementation and greater amounts of  
481 increment splitting and coalescence than adult cementum (Klevezal and Stewart,  
482 1994). Standard deviations of increment pair counts (average = 0.83) for the 30  
483 individual CT slices examined for each individual did not exceed one for any *Macaca*  
484 *mulatta* individual. This suggests a precision of within one year for estimated  
485 increment counts using the proposed cementum increment counting algorithm.

486

## 487 **4. Discussion**

### 488 *4.1. Image quality of SR CT data and optimisation of cementum imaging*

489 The positive relationship observed between both SNR and CNR with increasing  
490 exposure time and number of projections has been expected following SR CT  
491 imaging of other hard tissues (Tafforeau et al., 2007; Bouxsein et al., 2010). The  
492 opposite relationship seen between SNR and X-ray energy can also be explained by a  
493 diminished X-ray absorption with increased X-ray energy due to an exponentially  
494 decreased probability of photoelectric interactions between X-rays and the tissue.  
495 CNR has a more complex relationship with each experimental setting, with an  
496 optimum setting at a different level compared to SNR for each experimental setting.

497 For instance, we located the optimal energy at TOMCAT for cementum increments in  
498 terms of CNR at around 20-21 keV, while SNR was highest at 19 KeV and  
499 continuously decreased with higher X-ray energies.

500 The steady increase in SNR with increasing sample-to-detector distance is in  
501 agreement with the results of Kitchen et al. (2017), but in contrast to the results of  
502 Zeller-Plumhoff et al. (2017). Instead, Zeller-Plumhoff et al. (2017) found that SNR  
503 of PPCI SR CT data of muscle tissue steadily decreased when sample-to-detector  
504 distance was increased between 30 mm and 60 mm at TOMCAT. The main factors  
505 responsible for the increase in SNR with increasing sample-to-detector distance in our  
506 study are the steady decrease in the standard deviation of the image background ( $\sigma_b$ )  
507 with increasing sample-to-detector distance versus the peak in mean greyscale value  
508 of cementum ( $\overline{g_c}$ ) between 28-60 mm (Fig. 4e). The Paganin phase retrieval  
509 algorithm acts as a low pass filter, reducing the image noise in the resultant CT  
510 reconstructions. This filtering has been enhanced here with increased sample-to-  
511 detector and hence propagation distance, as shown by Kitchen et al. (2017). The  
512 reason for the different patterns encountered in SNR between the results of Kitchen et  
513 al. (2017) and those of Zeller-Plumhoff et al. (2017) were attributed by Zeller-  
514 Plumhoff et al. to be due to different targets in terms of image quality, when  
515 considering the optimal ratio of  $\delta/\beta$  for the Paganin phase retrieval algorithm. The  
516 objective of Kitchen et al., and of our study, was primarily to enhance image contrast  
517 within the PPCI SR CT data, whereas Zeller-Plumhoff et al. also considered the  
518 sharpness of feature boundaries when optimising  $\delta/\beta$ . Moreover, the material  
519 properties of cementum are different to the soft tissues studied by both Kitchen et al.  
520 (2017) (lung tissue) and Zeller-Plumhoff et al. (2017) (muscle tissue).

521 *4.2. X-ray PPCI versus thin-section imaging for counting cementum increments*

522 The first objective of this study was to optimise PPCI through SR CT for studying  
523 cementum increments in 3D tomographic data, as an alternative strategy to  
524 destructive thin-sectioning and light microscopy for imaging and counting cementum  
525 increments. We have shown here that optimised PPCI strategies can overcome the  
526 principal caveats of thin-section imaging: namely the destructive sample preparation  
527 process and the limited 2D view of tissue that is actually 3D in nature, so lacking  
528 context for interpreting complexities in increment patterns; and also limited control  
529 over which cementum tissue type is imaged (AEFC versus CIFC). The high image  
530 quality offered by SR CT, including phase retrieval offered in PPCI, has provided  
531 comparable fidelity for counting individual cementum increments to thin-section  
532 histological images of the same regions. The volumetric nature of CT datasets allows  
533 navigation through the entire cementum tissue at an isotropic and sub-micrometre  
534 nominal spatial resolution. Individual cementum increments can be followed across  
535 regions exhibiting complex cementum patterns, created by splitting and coalescence  
536 of increments, and regions of CIFC can be avoided when analysing AEFC. This  
537 minimises the potential for inaccurate increment counting. As a non-destructive  
538 technique the use of PPCI through SR CT for cementochronology permits the study of  
539 cementum in specimens previously beyond the reach of traditional histological  
540 analyses that are destructive, including fossils (Newham et al., 2020b) and  
541 archaeological specimens (Mani-Caplazi et al. 2017; Le Cabec et al., 2019). As there  
542 is no physical thin-sectioning of the tissue involved for CT, images are not affected by  
543 tissue preparation artefacts such as scratches on the ground and polished thin section  
544 or tissue distortion through the mechanical cutting process, which can obscure or alter  
545 image details on cementum increments (Czermak et al., 2006; Naji et al., 2016).

546           However, our PPCI of cementum through SR CT has also highlighted the  
547 sensitivity of cementum image quality to experimental settings. This suggests that  
548 optimisation of experimental settings should be conducted preliminary to every  
549 cementochronological PPCI experiment using SR CT, in order to ensure optimised  
550 image quality for identifying and counting cementum increments. Optimal  
551 experimental settings are specific to the optics of the synchrotron beamline and the  
552 material properties, size and morphology of the specimen, and so should be  
553 investigated when any of these factors are changed. Also, although CT is generally  
554 considered to be non-destructive it became apparent during scanning that micrometre-  
555 scale cracks, which are not visible macroscopically, have formed within the  
556 cementum tissue (Supplementary Fig. S3) due the interaction of the hard X-rays with  
557 the teeth and/or related effects due to this interaction. Although this damage could not  
558 be seen macroscopically, it may indicate that further preparation of teeth and/or  
559 adaptation of experimental conditions for SR CT imaging is needed, including tissue  
560 dehydration and/or cooling (Peña Fernández et al., 2019).

#### 561 *4.3. Cementum increment counting algorithm*

562 The second objective of this study was to provide a validated, semi-automated and  
563 robust algorithm for user-independent counting of cementum increments. The manual  
564 counting of cementum increments amongst a restricted number of thin-sections per  
565 tooth, plays a central role in the current user-dependent approach for counting  
566 cementum increments. This subjectivity has led to a wide range of different  
567 accuracies and precisions reported for increment counts and their correlation with  
568 known age in animal and human samples. Both accuracy and precision in estimated  
569 increment counts correlate with the experience of the researcher when compared to  
570 known age (i.e. expected increment count) in validation studies (Naji et al., 2016).

571 Our algorithm offers a new method for objectively counting cementum increments  
572 in a user-independent and semi-automated fashion. This substantially decreases the  
573 subjectivity and propensity for human error involved in increment counting. Within  
574 the same selected sample of straightened, isolated and filtered PPCI slices, our  
575 algorithm requires no further human input for counting cementum increments and will  
576 estimate the same increment count regardless of the experience of the researcher. The  
577 accuracy and precision of this algorithm has been validated here for both simulated  
578 data and our experimental sample of *Macaca mulatta* cementum. It could also be  
579 further assessed in the same quantitative manner with other PPCI cementum data  
580 from animals of known age. Such assessment will allow for further optimisation of  
581 our algorithm and tailoring for a wide range of PPCI cementum data.

582 Finally, although we state the advantages of PPCI imaging over traditional  
583 thin-section histological imaging here, the validation of our application on thin-  
584 section data of cementum from animals of known age may afford its application for  
585 thin-section images. If found to be an accurate method for counting thin-section  
586 increments, implementation of our algorithm for thin-sections has potential as an  
587 important tool for validating the accuracy of counts estimated by-eye, or even  
588 discounting the need for counting increments by-eye completely.

589

## 590 **5. Conclusion**

591 In conclusion, we have undertaken a first systematic experimental study on cementum  
592 increment counting for non-fossilised dental tissue, based on a comparison between  
593 optimised PPCI through SR CT and thin-section histological imaging. Comparison  
594 between these two imaging techniques has shown that PPCI SR CT data can provide  
595 sufficient spatial resolution and image contrast to reproduce individual growth



596 increments in the cementum tissue. CT reconstructions are of sufficient quality to  
597 count increments semi-automatically using image processing, by defining them as  
598 peaks and troughs in greyscale values along transects through the cementum. We have  
599 implemented this semi-automated method of increment counting as part of a novel  
600 workflow of image processing (cementum isolation, straightening and filtering) and  
601 analysis (application of a purpose-built increment counting algorithm). This may help  
602 future studies to overcome the central caveat facing current studies of cementum  
603 increments: the subjectivity inherent in counting increments by eye that depends on  
604 the individual researcher. The combination of non-destructive imaging and objective  
605 increment counting may open up a new range of specimens, samples and studies not  
606 suitable for destructive thin-section analysis, and help to exploit the potential of  
607 cementum as a record of life history for archaeology, anthropology, forensic science  
608 and palaeontology.

609 **Acknowledgments and funding:** This study was part-funded by a Natural  
610 Environmental Research Council/Engineering and Physical Sciences Research  
611 Council doctoral candidateship (UK; grant number NE/R009783/1). Funding was also  
612 provided by Ginko Investments Ltd (Bristol, UK), and the Academy of Finland. We  
613 acknowledge the Paul Scherrer Institute, Villigen, Switzerland for provision of  
614 synchrotron radiation beamtime at the TOMCAT beamline of the SLS (Experiment  
615 20151391) and would like to thank Iwan Jerjen, Mark Mavrogordato, Orestis  
616 Katsamenis, Sharif Ahmed, Christianne Fernee Juan Núñez, and Priscilla Bayle for  
617 their assistance during our beamtime.

618 **Conflict of interest.** The authors report no conflicts of interest.

619 **Author contributions.** EN designed, validated and performed all analyses. All  
620 authors were involved in writing the proposal for synchrotron beamtime and  
621 synchrotron imaging. All authors contributed to drafting and revising the manuscript.

622 **Data accessibility.** All data supporting this study are openly available from the  
623 University of Southampton repository (“<https://doi.org/10.5258/SOTON/D1722>”).

624 **6. References**

- 625 • Bosshardt DD, Selvig KA. Dental cementum: the dynamic tissue covering of the  
626 root. *Periodontol.* 2000. 1997;13(1):41-75.
- 627 • Bosshardt D, Schroeder HE. Evidence for rapid multipolar and slow unipolar  
628 production of human cellular and acellular cementum matrix with intrinsic  
629 fibers. *J. Clin. Periodontol.* 1990;17(9):663-668.
- 630 • Bosshardt DD, Schroeder HE. Initial formation of cellular intrinsic fiber  
631 cementum in developing human teeth. *Cell Tissue Res.* 1992;267(2):321-335.
- 632 • Bouxsein, M. L., Boyd, S. K., Christiansen, B. A., Guldberg, R. E., Jepsen, K. J.,  
633 Müller, K. J. Guidelines for assessment of bone microstructure in rodents using  
634 micro-computed tomography. *J. Bone Miner. Res.* 2010;25(7):1468-1486.
- 635 • Bowen WH, Koch G. Determination of age in monkeys (*Macaca irus*) on the  
636 basis of dental development. *Lab. Anim.* 1970;4(1):113-123.
- 637 • Czermak A, Czermak A, Ernst H, Grupe G. A new method for the automated age-  
638 at-death evaluation by tooth-cementum annulation (TCA). *Anthropol. Anz.*  
639 2006;64(1):25-40.
- 640 • Esfahani M, Munir KS, Wen C, Zhang J, Durandet Y, Wang J, et al. Mechanical  
641 properties of electrodeposited nanocrystalline and ultrafine-grained Zn-Sn  
642 coatings. *Surf. Coat. Technol.* 2018;333:71–80.
- 643 • Freeman WT, Adelson EH. The Design and Use of Steerable Filters. *IEEE*  
644 *Transactions on Pattern Analysis and Machine Intelligence.* 1991;13(9):891–906.
- 645 • Frie AK, Fagerheim KA, Hammill MO, Kapel FO, Lockyer C, Stenson GB, et al.  
646 Error patterns in age estimation of harp seals (*Pagophilus groenlandicus*): results  
647 from a transatlantic, image-based, blind-reading experiment using known-age  
648 teeth. *ICES J. Mar. Sci.* 2011;68(9):1942-1953.

- 649 • Frie AK, Hammill MO, Hauksson E, Lind Y, Lockyer C, Stenman O, et al. Error  
650 patterns in age estimation and tooth readability assignment of grey seals  
651 (*Halichoerus grypus*): results from a transatlantic, image-based, blind-reading  
652 study using known-age animals. ICES J. Mar. Sci. 2012;70(2):418-430.
- 653 • Gadelmawla ES, Koura MM, Maksoud TMA, Elewa IM, Soliman HH. Roughness  
654 parameters. Journal of materials processing Technology.2002;123(1):133-145.
- 655 • Geppert EG, Müller KH. Die wurzelzementapposition als meßbarer ausdruck der  
656 kaudruckbelastung des zahnes. Dtsch. Zahn Mund Kieferheilkd. Zentralbl.  
657 Gesamte. 1951;15:30-119.
- 658 • Goggin PM, Zygalkis KC, Oreffo RO, Schneider P. High-resolution 3D imaging  
659 of osteocytes and computational modelling in mechanobiology: insights on bone  
660 development, ageing, health and disease. Eur. Cells and Mater. 2016;31:264-95.
- 661 • Goring A, Sharma A, Javaheri B, Smith RC, Kanczler JM, Boyde A, et al.  
662 Regulation of the bone vascular network is sexually dimorphic. J. Bone Miner.  
663 Res. 2019; DOI:10.1002/jbmr.3825.
- 664 • Grandfield K, Chattah NLT, Djomehri S, Eidelmann N, Eichmiller FC, Webb S,  
665 et al. The narwhal (*Monodon monoceros*) cementum–dentin junction: A  
666 functionally graded biointerphase. Proceedings of the Institution of Mechanical  
667 Engineers, Part H: JIEM. 2014;228(8):754-767.
- 668 • Green DR, Green GM, Colman AS, Bidlack FB, Tafforeau P, Smith TM.  
669 Synchrotron imaging and Markov chain Monte Carlo reveal tooth mineralization  
670 patterns. PloS one. 2017;12(10):e0186391.
- 671 • Immel A, Le Cabec A, Bonazzi M, Herbig A, Temming H, Schuenemann VJ, et  
672 al. Effect of X-ray irradiation on ancient DNA in sub-fossil bones–Guidelines for  
673 safe X-ray imaging. Sci. Rep. 2016;6:32969.

- 674 • d’Incau E, Couture C, Maureille B. Human tooth wear in the past and the present:  
675 tribological mechanisms, scoring systems, dental and skeletal  
676 compensations. *Arch. Oral Biol.* 2012;57(3):214-229.
- 677 • Kagerer P, Grupe G. Age-at-death diagnosis and determination of life-history  
678 parameters by incremental lines in human dental cementum as an identification  
679 aid. *Forensic Sci. Int.* 2001;118(1):75-82.
- 680 • Kaifu Y, Kasai K, Townsend GC, Richards LC. Tooth wear and the “design” of  
681 the human dentition: a perspective from evolutionary medicine. *Am. J. Phys.*  
682 *Anthropol.* 2003;122(S37): 47-61.
- 683 • Kasetty S, Rammanohar M, Raju Ragavendra T. Dental cementum in age  
684 estimation: a polarized light and stereomicroscopic study. *J. Forensic*  
685 *Sci.* 2010;55(3): 779-783.
- 686 • Kitchen MJ, Buckley GA, Gureyev TE, Wallace MJ, Andres-Thio N, Uesugi K, et  
687 al. CT dose reduction factors in the thousands using X-ray phase contrast. *Sci.*  
688 *Rep.* 2017;7(1):15953.
- 689 • Klauenberg K, Lagona, F. Hidden Markov random field models for TCA image  
690 analysis. *Computational Statistics & Data Analysis.* 2007;52(2):855-868.
- 691 • Klevezal G. (1996) Recording structures of mammals. Boca Raton, Florida: CRC  
692 Press; 1996.
- 693 • Klevezal, G., Stewart, B. S. Patterns and calibration of layering in tooth  
694 cementum of female northern elephant seals, *Mirounga angustirostris*. *J.*  
695 *Mammal.* 1994;75(2):483-487.
- 696 • Kvaal SI, Solheim T. Incremental lines in human dental cementum in relation to  
697 age. *Eur. J. Oral Sci.* 1995;103(4):225-230.

- 698 • Le Cabec A, Tang NK, Ruano Rubio V, Hillson S. Nondestructive adult age at  
699 death estimation: Visualizing cementum annulations in a known age historical  
700 human assemblage using synchrotron X-ray microtomography. *Am. J. Phys.*  
701 *Anthropol.* 2019;168(1);25-44.
- 702 • Le Cabec A, Tang N, Tafforeau P. (2015) Accessing developmental information  
703 of fossil hominin teeth using new synchrotron microtomography-based  
704 visualization techniques of dental surfaces and interfaces. *PLoS*  
705 *one.* 2015;10(4):e0123019.
- 706 • Levy G, Mailland ML. Quantitative study of the effect of occlusal hypofunction  
707 on periodontal ligament with and alveolar osteoclastic resorption in rats. *J. Biol.*  
708 *Buccale.* 1980;8(1):17-31.
- 709 • Lieberman DE. 1993. Life history variables preserved in dental cementum  
710 microstructure. *Science.* 1993;261(5125):1162-1164.
- 711 • Lieberman DE, Deacon TW, Meadow RH. Computer image enhancement and  
712 analysis of cementum increments as applied to teeth of *Gazella gazella*. *J.*  
713 *Archaeol. Sci.* 1990;17(5):519-533.
- 714 • Lipsinic FE, Paunovich E, Houston GD, Robison SF. Correlation of age and  
715 incremental lines in the cementum of human teeth. *J. Forensic Sci.*  
716 1986;31(3):982-989.
- 717 • Listgarten MA, Lang NP, Schroeder HE, Schroeder A. Periodontal tissues and  
718 their counterparts around endosseous implants. *Clin. Oral Implants Res.*  
719 1991;2(1):1-19.
- 720 • Lozano M, Bermúdez de Castro JM, Carbonell E, Arsuaga JL. Non- masticatory  
721 uses of anterior teeth of Sima de los Huesos individuals (Sierra de Atapuerca,  
722 Spain). *J. Hum. Evol.* 2008;55(4):713–728.

- 723 • Marone F, Stampanoni M. Regridding reconstruction algorithm for real-time  
724 tomographic imaging. *J. Synchrotron Radiat.* 2012;19:1029-1037.
- 725 • Martinez WL, Martinez AR. Computational statistics handbook with MATLAB.  
726 Boca Baton, Florida: Chapman and Hall/CRC Press; 2015.
- 727 • Mayo SC, Davis TJ, Gureyev TE, Miller PR, Paganin D, Pogany A, et al. X-ray  
728 phase-contrast microscopy and microtomography. *Opt. Express.*  
729 2003;11(19):2289-2302.
- 730 • Naji S, Colard T, Blondiaux J, Bertrand B, d’Incau E, Bocquet-Appel JP.  
731 Cementochronology, to cut or not to cut? *Int. J. Paleopathol.* 2016;15:113-119.
- 732 • Newham E, Corfe IJ, Brown KR, Gostling NJ, Gill PG, Schneider P. Synchrotron  
733 radiation-based X-ray tomography reveals life history in primate cementum  
734 incrementation. *J. R. Soc. Interface.* 2020a;17(172):20200538.
- 735 • Newham E, Gill PG, Brewer P, Benton MJ, Fernandez V, Gostling N J, et al.  
736 Reptile-like physiology in Early Jurassic stem-mammals. *Nat. Commun.*  
737 2020b;11(1):1-13.
- 738 • Nixon M, Aguado AS. Feature extraction and image processing for computer  
739 vision. Cambridge, Massachusetts: Academic Press; 2012.
- 740 • Núñez JA, Goring A, Hesse E, Thurner PJ, Schneider P, Clarkin CE.  
741 Simultaneous visualisation of calcified bone microstructure and intracortical  
742 vasculature using synchrotron X-ray phase contrast-enhanced tomography. *Sci.*  
743 *Rep.* 2017;7(1):13289.
- 744 • Obertová Z, Francken M. Tooth cementum annulation method: accuracy and  
745 applicability. In Koppe T, Meyer G, Alt KW, Brook A, Dean MC, Kjaer I, et al.  
746 editors. *Comparative dental morphology* Vol. 13. Basel, Switzerland; 2009. p.  
747 184-189.

- 748 • Paganin D, Mayo SC, Gureyev TE, Miller PR, Wilkins SW. Simultaneous phase  
749 and amplitude extraction from a single defocused image of a homogeneous  
750 object. *J. Microsc.* 2002;206(1):33-40.
- 751 • Pena Fernandez M, Dall'Ara E, Kao AP, Bodey AJ, Karali A, Blunn GW, et al.  
752 Preservation of bone tissue integrity with temperature control for in situ SR-  
753 MicroCT experiments. *Materials (Basel)*. 2018;11(11).
- 754 • Rolandsen CM, Solberg EJ, Heim M, Holmstrøm F, Solem MI, Sæther BE.  
755 Accuracy and repeatability of moose (*Alces alces*) age as estimated from dental  
756 cement layers. *Eur. J. Wildl. Res.* 2008;54(1):6-14.
- 757 • Sanchez S, Ahlberg PE, Trinajstić KM, Mirone A, Tafforeau P. Three-  
758 dimensional synchrotron virtual paleohistology: a new insight into the world of  
759 fossil bone microstructures. *Microsc. Microanal.* 2012;18(5):1095-1105.
- 760 • Schneider CA, Rasband WS, Eliceiri KW. NIH Image to ImageJ: 25 years of  
761 image analysis. *Nat. Methods.* 2012;9(7):671.
- 762 • Schneider P, Krucker T, Meyer E, Ulmann-Schuler A, Weber B, Stampanoni M,  
763 et al. Simultaneous 3D visualization and quantification of murine bone and bone  
764 vasculature using micro-computed tomography and vascular replica. *Microsc.*  
765 *Res. Tech.* 2009;72(9):690-701.
- 766 • Schneider P, Stauber M, Voide R, Stampanoni M, Donahue R, Müller R.  
767 Ultrastructural properties in cortical bone vary greatly in two inbred strains of  
768 mice as assessed by synchrotron light based micro- and nano-CT. *J. Bone Miner.*  
769 *Res.* 2007;22(10):1557-1570.
- 770 • Spina CA. A review of the age determination of mammals by means of teeth,  
771 with especial reference to Africa. *Afr. J. Ecol.* 1973;11(2):165-187.



- 772 • Stock SR, Finney LA, Telser A, Maxey E, Vogt S, Okasinski JS. (2017)  
773 Cementum structure in Beluga whale teeth. *Acta biomater.* 2017;4:289-299.
- 774 • Stutz AJ. (2002) Polarizing microscopy identification of chemical diagenesis in  
775 archaeological cementum. *J. Archaeol. Sci.* 2002;29(11):1327-1347.
- 776 • Tafforeau P, Bentaleb I, Jaeger JJ, Martin C. Nature of laminations and  
777 mineralization in rhinoceros enamel using histology and X-ray synchrotron  
778 microtomography: potential implications for palaeoenvironmental isotopic  
779 studies. *Palaeogeogr. Palaeoclimatol. Palaeoecol.* 2007;246(2-4):206-227.
- 780 • Tafforeau P, Boistel R, Boller E, Bravin A, Brunet M, Chaimanee Y, et al.  
781 Applications of X-ray synchrotron microtomography for non-destructive 3D  
782 studies of paleontological specimens. *Appl.* 2006;83(2):195-202.
- 783 • Tafforeau P, Smith TM. Nondestructive imaging of hominoid dental  
784 microstructure using phase contrast X-ray synchrotron microtomography. *J. Hum.*  
785 *Evol.* 2008;54(2):272-278.
- 786 • von Cramon-Taubadel N. Global human mandibular variation reflects differences  
787 in agricultural and hunter-gatherer subsistence strategies. *Proc. Nat. Acad. Sci.*  
788 2011;108(49):19546–19551.
- 789 • Wall-Scheffler CM, Foley RA. Digital cementum luminance analysis (DCLA): a  
790 tool for the analysis of climatic and seasonal signals in dental cementum. *Int. J.*  
791 *Osteoarchaeol.* 2008;18(1):11-27.
- 792 • Zander HA, Hürzeler B. (1958) Continuous cementum apposition. *J. Dental Res.*  
793 1958;37(6):1035-1044.
- 794 • Zeller-Plumhoff B, Mead JL, Tan D, Roose T, Clough GF, Boardman RP, et al.  
795 Soft tissue 3D imaging in the lab through optimised propagation-based phase  
796 contrast computed tomography. *Opt. Express.* 2017;25(26):33451-33468.

797

798 **Figure captions**

799 **Figure 1. Histological data of rhesus macaque (*Macaca mulatta*) cementum in the**  
800 **lower first molar tooth.**

801 (a) Reflected light digital micrograph of the cementum tissue under 20×  
802 magnification. Cementum (C) is defined as the tissue wrapping around the  
803 circumference of the dentine (D), comprising a series of circumferential increments.  
804 Blue dashed line highlights a surface scratch created during the thin-sectioning  
805 process. (b) Detail marked by red dashed box in (a) displaying cementum increments  
806 in acellular extrinsic fibre cementum, and cellular voids left by cementoblasts in  
807 cellular intrinsic fibre cementum (CIFC) under higher resolution (50× magnification).  
808 White arrows highlight ‘light’ increments, blue arrows highlight ‘dark’ increments,  
809 and red arrows highlight cementoblasts. Red bracketed lines highlight cellular intrinsic  
810 fibre cementum. Green bracketed line highlights the hyaline layer of Hopewell-Smith,  
811 demarcating the cemento-dentine boundary. Scale bar in (a) represents 100 µm. Scale  
812 bar in (b) represents 30 µm.

813

814 **Figure 2. Tomographic cementum increment counting.** (a) Straightened, filtered  
815 PPCI SR CT image of *Macaca mulatta* cementum. (b) Plot of greyscale values along  
816 transect highlighted by the 10 pixel-thick coloured band in (a) with outer-cementum  
817 surface highlighted with orange asterisk and cemento-dentine boundary by red  
818 asterisk. Transects are split into five sections. Light/dark increment pairs are  
819 distinguished as peak/trough systems in greyscale values, where both the peak and  
820 trough depart from the mean greyscale value of that section (red line), beyond the half  
821 standard deviations of greyscale values within the section above the mean (green line)

822 and below the mean (blue line), respectively. (c) Sections split into their upper and  
823 lower datasets comprising of peaks and troughs in greyscale that exceed beyond the upper  
824 and lower standard deviation (respectively). Here, peak/trough pairs are counted, denoted  
825 with red numbers. Troughs and peaks that are not counted are denoted in blue numerals,  
826 as they either do not exceed the standard deviation of that section or are less than three  
827 pixels away from the last respective peak/trough. (d) Resulting increment pair counts for  
828 each section as seen in (b).

829

830 **Figure 3. SR CT scan of a tooth root and regions for signal-to-noise ratio**

831 **(SNR) and contrast-to-noise ratio (CNR) calculations.** (a) One CT slice of the  
832 tooth root of *Macaca mulatta* individual 156. Blue box highlights the region of  
833 interest for evaluation of background signal from which the mean greyscale value  
834 ( $\overline{g}_b$ ) and standard deviation of greyscale values ( $\sigma_b$ ) was generated for SNR and  
835 CNR calculations (see Equations (1) & (2)). The green box highlights the  
836 sampling area for cementum signal from which the mean greyscale value ( $\overline{g}_c$ ) was  
837 generated for SNR and CNR calculations. Dashed red boxes indicate regions  
838 highlighted of the detail views. (b) Detail from region indicated by dashed red  
839 boxes in (a) from the dataset acquired at 16 mm sample-to-detector distance. (c)  
840 Detail from the same region from the dataset acquired at 28 mm sample-to-detector  
841 distance. (d) Detail from the same region from the dataset acquired at 100 mm  
842 sample-to-detector distance. (e) Plots of greyscale values along transects indicated  
843 by dashed lines in (b-d), acquired at different sample-to-detector distances. (a-d)  
844 White scale bars in (a) represent 100  $\mu\text{m}$  in the overview image, 30  $\mu\text{m}$  in the  
845 detail view highlighted by the red dashed box, and 10  $\mu\text{m}$  in (b-d).

846

847 **Figure 4. SNR and CNR for sweep of experimental settings for PPCI through**  
848 **SR CT.** Data shown is from specimen l56. (a) SNR (shown in black) and CNR  
849 (shown in red) values for different X-ray energies. (b) SNR and CNR values for  
850 different exposure times. (c) SNR and CNR values for different numbers of angular  
851 projections. (d) SNR and CNR values for different sample-to-detector distances. (e)  
852 Relationship between the standard deviation of background ( $\sigma_b$  – shown in black)  
853 and the mean of cementum signal ( $\overline{g_c}$  – shown in red) with increasing sample-to-  
854 detector distance.

855

856 **Figure 5. Image processing of PPCI SR CT images of *Macaca mulatta* cementum.**  
857 (a) One CT slice of specimen l59. (b) Detail of CT slice highlighting circumferential  
858 cementum increments with midline shown as yellow line. (c) Straightened cementum  
859 section following the midline highlighted in (b). (d) Filtered image of (c) using a  
860 steerable Gaussian filter.

861

862 **Figure 6. Robustness tests for algorithmic increment counts.** (a) Counts (black  
863 circles) and their standard deviations (green boxes) for incremental sine wave patterns  
864 of 5 up to 30 increments with signal-to-noise ratios (SNRs) of 0.9-0.5. Inset: box  
865 displaying an example of a 10-increment pattern with an SNR of 0.5. (b) Counts and  
866 their standard deviations for incremental sine wave patterns of 5 up to 30 increments  
867 with SNRs of 0.4-0.2. Inset; box displaying an example of a 10-increment pattern  
868 with an SNR of 0.2. (c) Counts and their standard deviations for incremental sine  
869 wave patterns of 5 up to 30 increments with an SNR of 0.1. Inset: box displaying an  
870 example of a 10-increment pattern with an SNR of 0.1.

871

872 **Figure 7. Comparison between histological and CT data.** (a) Detail of histological  
873 thin-section of the k49 specimen displaying 12 light increments indicated by blue  
874 arrows. (b) Detail of reconstructed CT slice of the same region as (a) displaying 11  
875 cementum increments. (c) Detail of histological thin-section of the t46 specimen  
876 displaying eight light cementum increments. (d) Detail of reconstructed CT slice of  
877 the same region as (c) displaying eight increments. (e) Detail of histological thin-  
878 section of the 159 specimen displaying 11 light increments. (f) Detail of reconstructed  
879 CT slice of the same region as (e) displaying 11 increments. (g) Detail of histological  
880 thin-section of the 156 specimen displaying 12 light increments. (h) Detail of  
881 reconstructed CT slice of the same region as (g) displaying 11 increments. (a-h) Black  
882 scale bars represent 30  $\mu\text{m}$ . Yellow whiskers highlight the granular layer of Tomes  
883 (labelled GLoT); pink dashed whiskers highlight the hyaline layer of Hopewell Smith  
884 (labelled HLHS); and red arrows highlight cellular voids within cellular intrinsic fibre  
885 cementum. Red dashed circles highlight surface damaged created during thin-section  
886 processing.

887

888 **Figure 8. 3D CT data of cementum increments.** Data shown is from specimen k49.  
889 (a) Straightened and filtered CT slice displaying 10 increment pairs, highlighted with  
890 coloured arrows. (b) Schematic of detail from a highlighted by dashed red box,  
891 showing complexities in increment patterns. Increments are given the same colour as  
892 their respective arrows in a. Instances of splitting are highlighted with dashed red  
893 lines, and instances of coalescence by blue dashed lines. (c) 3D model of segmented  
894 cementum increment patterns plotted through the majority of the root image by PPCI  
895 through SR CT. Scale bars represent 100  $\mu\text{m}$ .

896

897 **Figure 9. Comparison between known increment pair counts and those estimated**  
898 **by the proposed cementum increment counting algorithm.** PPCI SR CT data  
899 shown are from m1 teeth of ten *Macaca mulatta* individuals of known age (see Table  
900 1). Cyan boxes indicate the interquartile range around the mean estimated increment  
901 count, indicated by the thick black line. Whiskers represent the extreme lower and  
902 upper estimated counts. Blue circles indicate known age of each individual. Red  
903 triangles indicate the maximum and inverted green triangles indicate the minimum  
904 expected increment count for each individual based on the approximate age-of-  
905 eruption of the m1 at 18 months of age in *Macaca mulatta*.

906 **Table 1.**

| Specimen   | Age (years) | DOB      | DOD      | Known increment pair count |         | Estimated increment pair count |                    |
|------------|-------------|----------|----------|----------------------------|---------|--------------------------------|--------------------|
|            |             |          |          | Minimum                    | Maximum | Mean                           | Standard deviation |
| <b>K49</b> | 12          | 09.04.03 | 08.04.15 | 10                         | 11      | 10                             | 0.95               |
| <b>K91</b> | 11.5        | 06.10.03 | 10.04.15 | 9.5                        | 10.5    | 10                             | 0.81               |
| <b>K23</b> | 12          | 09.03.03 | 09.04.15 | 10                         | 11      | 10                             | 0.89               |
| <b>K24</b> | 12          | 12.03.03 | 08.04.15 | 10                         | 11      | 10                             | 0.96               |
| <b>L10</b> | 11          | 20.02.04 | 08.04.15 | 9                          | 10      | 9.5                            | 0.94               |
| <b>L14</b> | 11          | 26.02.04 | 10.04.15 | 9                          | 10      | 9.75                           | 0.86               |
| <b>T56</b> | 11          | 14.04.04 | 10.04.15 | 9                          | 10      | 10                             | 0.92               |
| <b>L59</b> | 11          | 17.04.04 | 09.04.15 | 9                          | 10      | 9.5                            | 0.71               |
| <b>K16</b> | 10.5        | 16.09.04 | 09.03.15 | 8.5                        | 9.5     | 9                              | 0.52               |
| <b>T46</b> | 5.5         | 11.03.10 | 07.07.15 | 3.5                        | 4.5     | 5                              | 0.94               |

907

908 **Table 1.** Life history data, known increment pair counts and estimated increment pair counts for each of the 10 female rhesus

909 macaque (*Macaca mulatta*) individuals studied. DOB = date of birth; DOD = date of death. Mean increment pair counts are

910 rounded to the nearest 0.25 years for comparison with known increment pair counts.

911 **Table 2.**

| <b>Scan name</b> | <b>Energy (keV)</b> | <b>Exposure time (ms)</b> | <b>Number of projections</b> | <b>Sample-to-detector distance (mm)</b> | <b>Mean SNR</b> | <b>Mean CNR</b> |
|------------------|---------------------|---------------------------|------------------------------|-----------------------------------------|-----------------|-----------------|
| SO20             | 19                  | 150                       | 1501                         | 14                                      | 187.9           | 50.7            |
| SO21             | 20                  | 150                       | 1501                         | 14                                      | 123.8           | 56.9            |
| SO22             | 21                  | 150                       | 1501                         | 14                                      | 112.9           | 60.8            |
| SO23             | 22                  | 150                       | 1501                         | 14                                      | 82.6            | 35.5            |
| SO24             | 26                  | 150                       | 1501                         | 14                                      | 72.0            | 24.5            |
| SO25             | 20                  | 100                       | 1501                         | 14                                      | 118.3           | 50.7            |
| SO26             | 20                  | 125                       | 1501                         | 14                                      | 124.0           | 55.4            |
| SO27             | 20                  | 300                       | 1501                         | 14                                      | 177.8           | 72.3            |
| SO28             | 20                  | 150                       | 3001                         | 14                                      | 245.4           | 74.5            |
| SO29             | 20                  | 150                       | 4501                         | 14                                      | 252.7           | 81.5            |
| SO30             | 20                  | 150                       | 6001                         | 14                                      | 300.5           | 84.9            |
| SO31             | 20                  | 150                       | 1501                         | 16                                      | 142.2           | 59.0            |
| SO32             | 20                  | 150                       | 1501                         | 20                                      | 152.9           | 68.9            |
| SO33             | 20                  | 150                       | 1501                         | 28                                      | 185.6           | 75.2            |
| SO34             | 20                  | 150                       | 1501                         | 60                                      | 179.6           | 77.8            |
| SO35             | 20                  | 150                       | 1501                         | 100                                     | 247.4           | 54.9            |

912

913 **Table 2. Image quality assessments of PPCI SR CT images using different**

914 **experimental settings. SNR = signal-to-noise ratio; CNR = contrast-to-noise ratio.**



Figure 1.

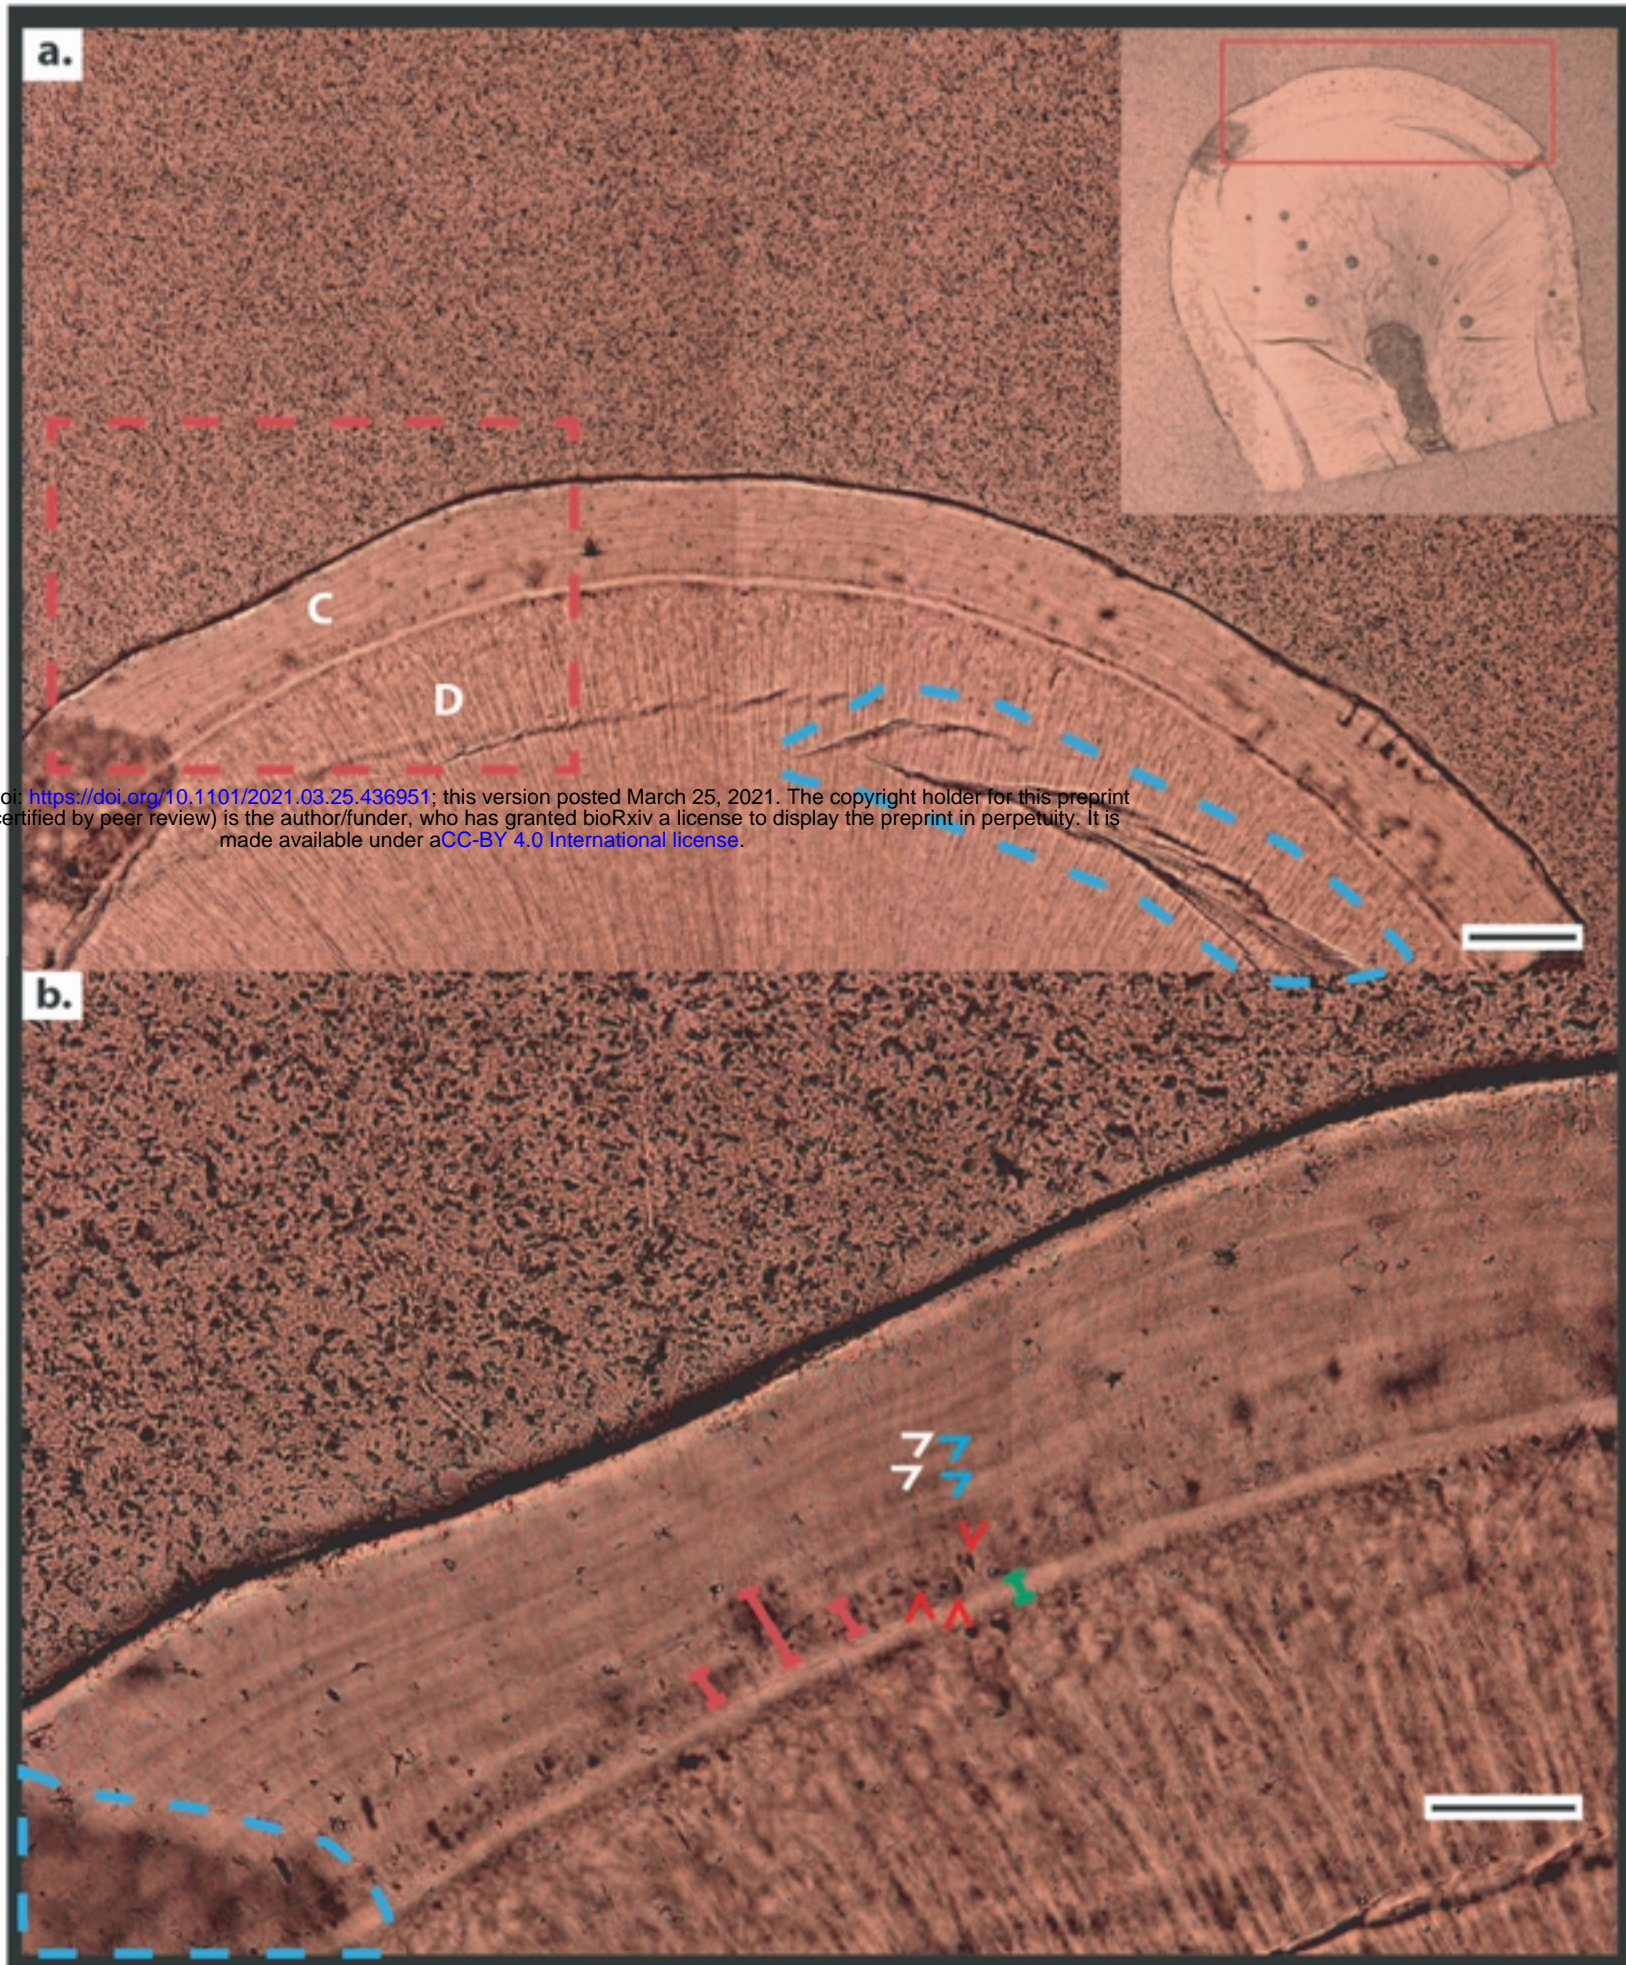



Figure 3.

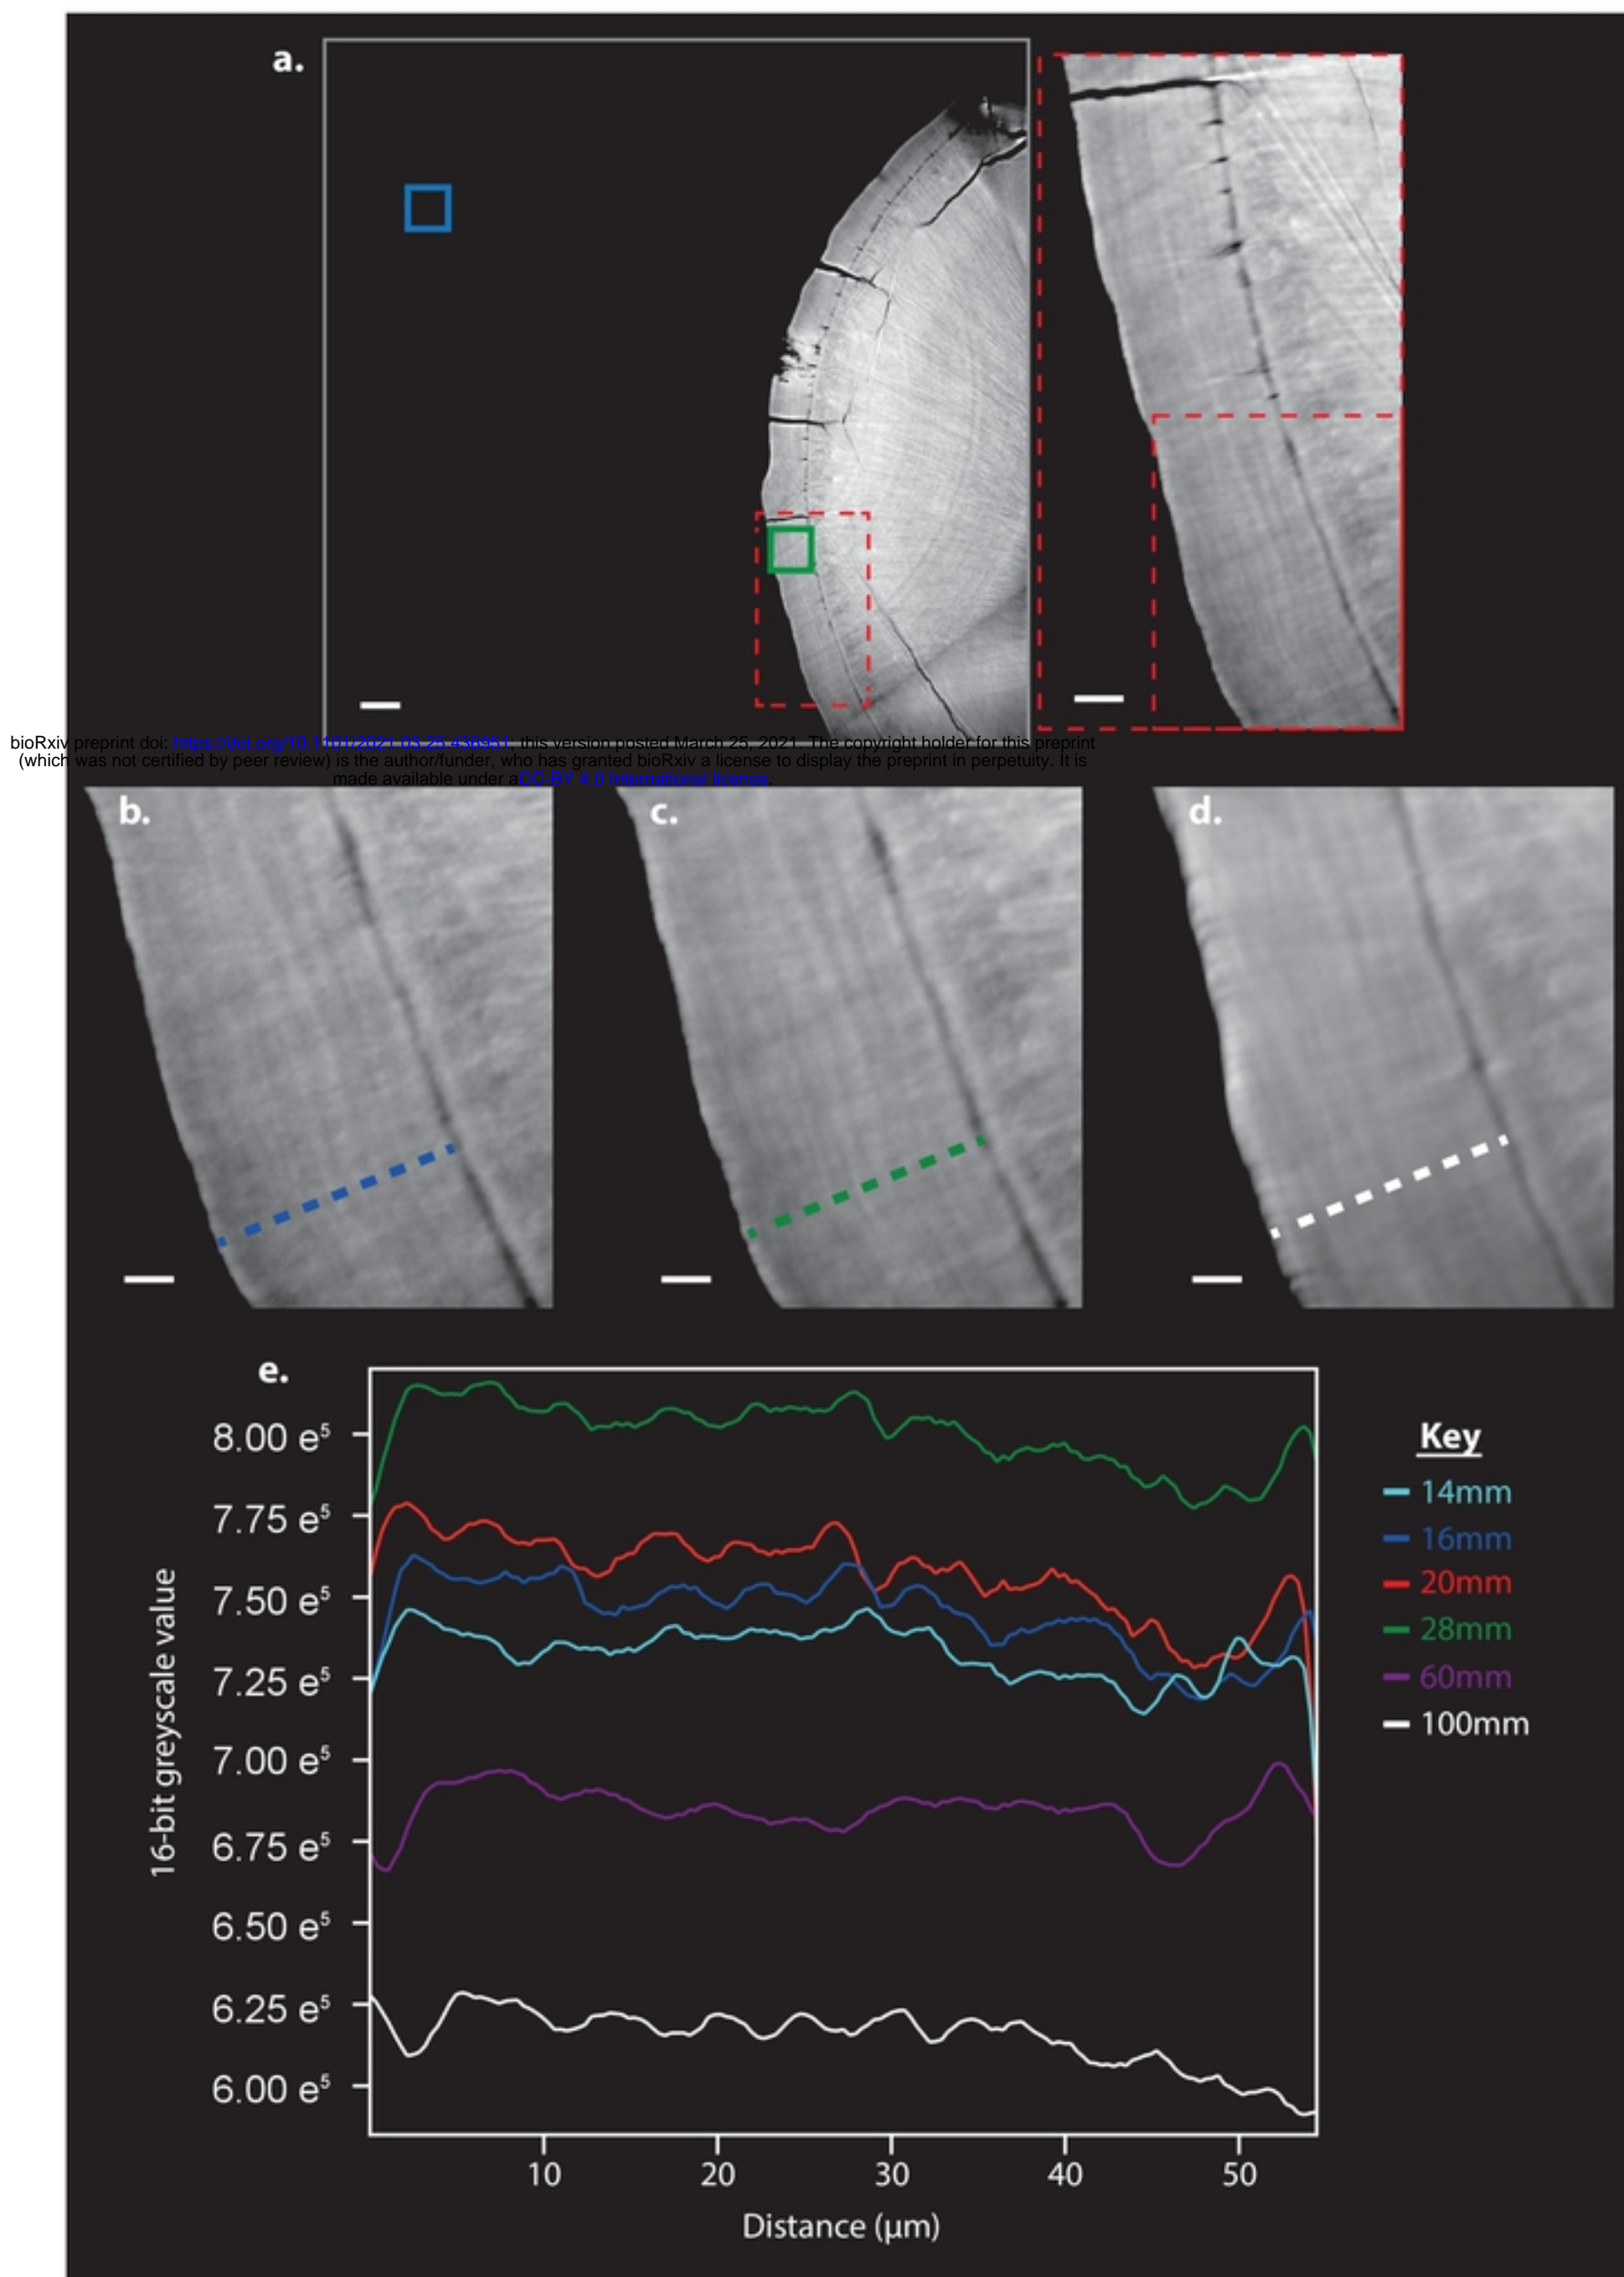

Figure 4.

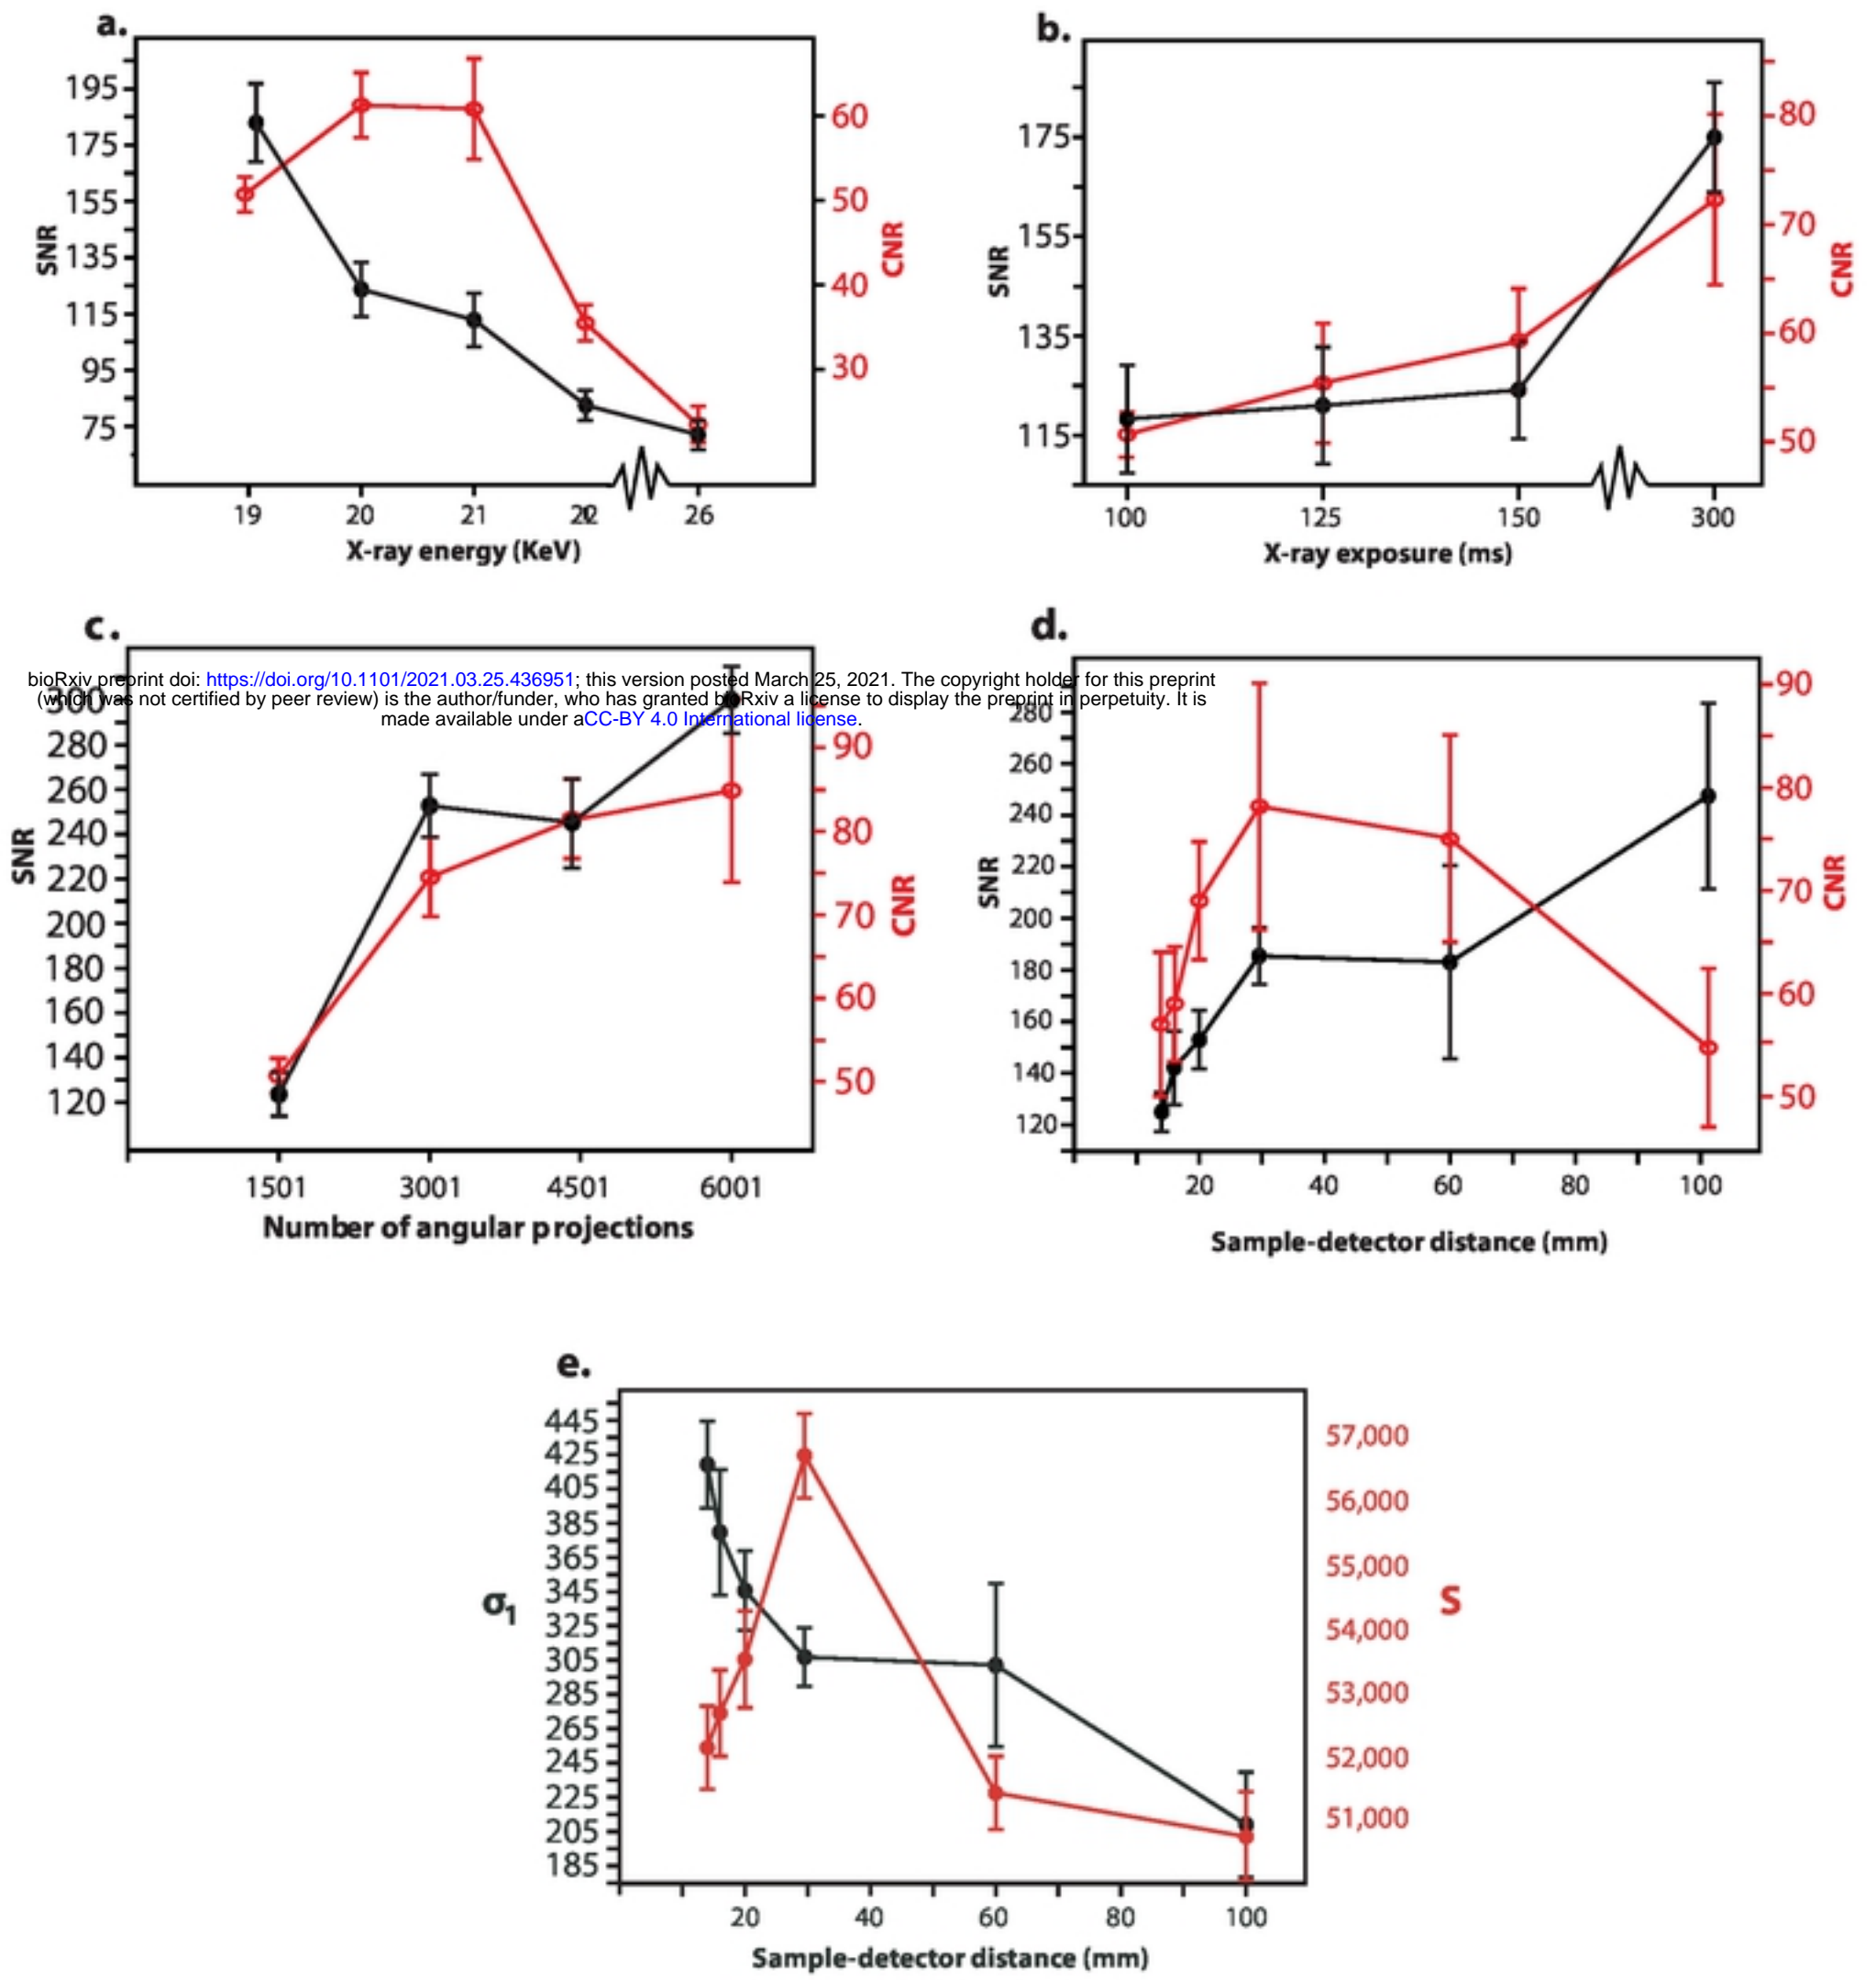

Figure 5.

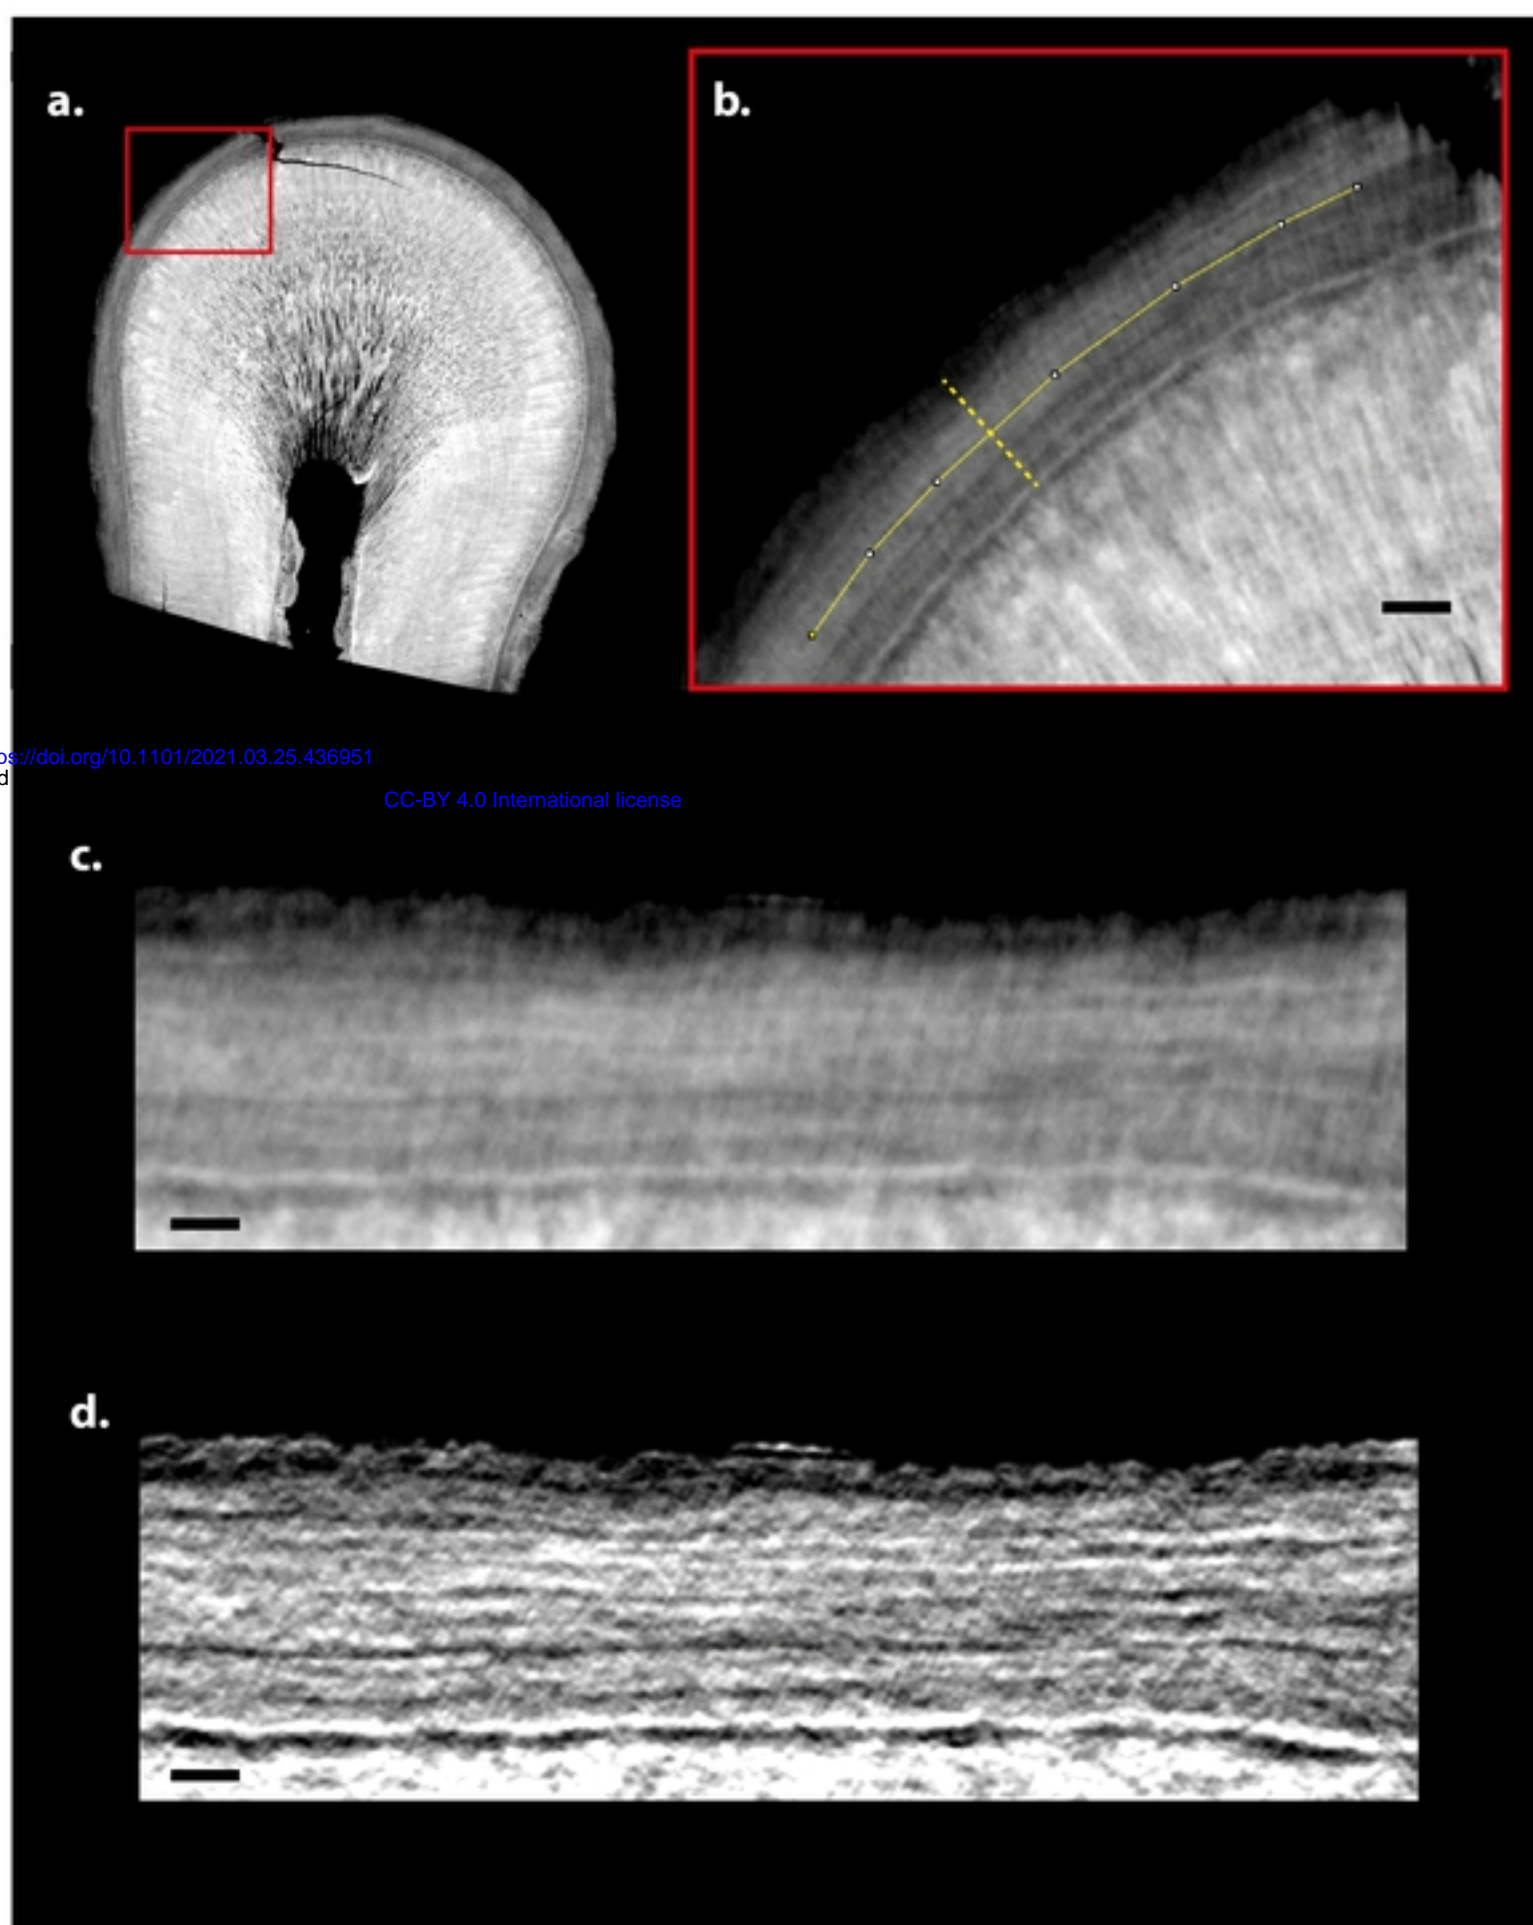

bioRxiv preprint doi: <https://doi.org/10.1101/2021.03.25.436951>  
(which was not certified by peer review)

CC-BY 4.0 International license



Figure 8.

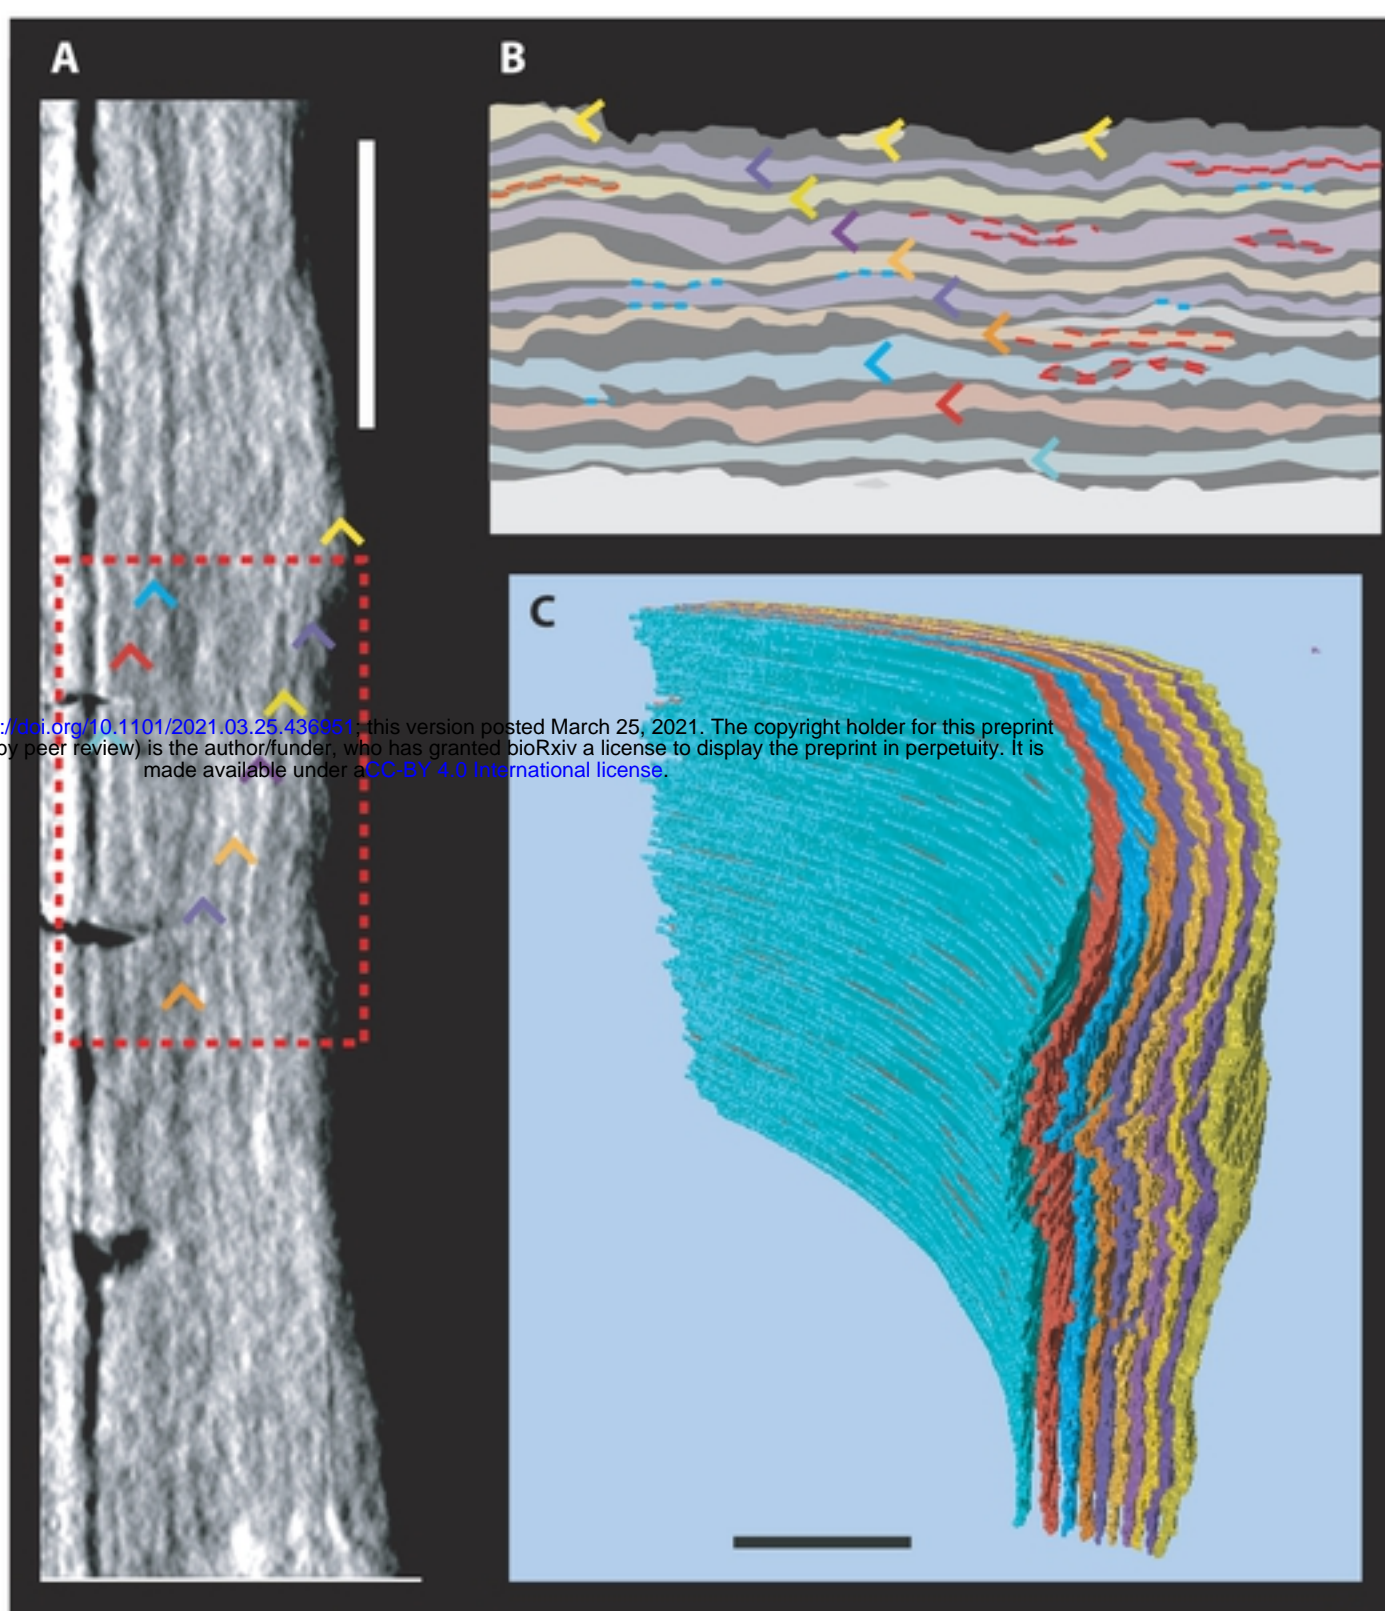

bioRxiv preprint doi: <https://doi.org/10.1101/2021.03.25.436951>; this version posted March 25, 2021. The copyright holder for this preprint (which was not certified by peer review) is the author/funder, who has granted bioRxiv a license to display the preprint in perpetuity. It is made available under aCC-BY 4.0 International license.

Figure 2.

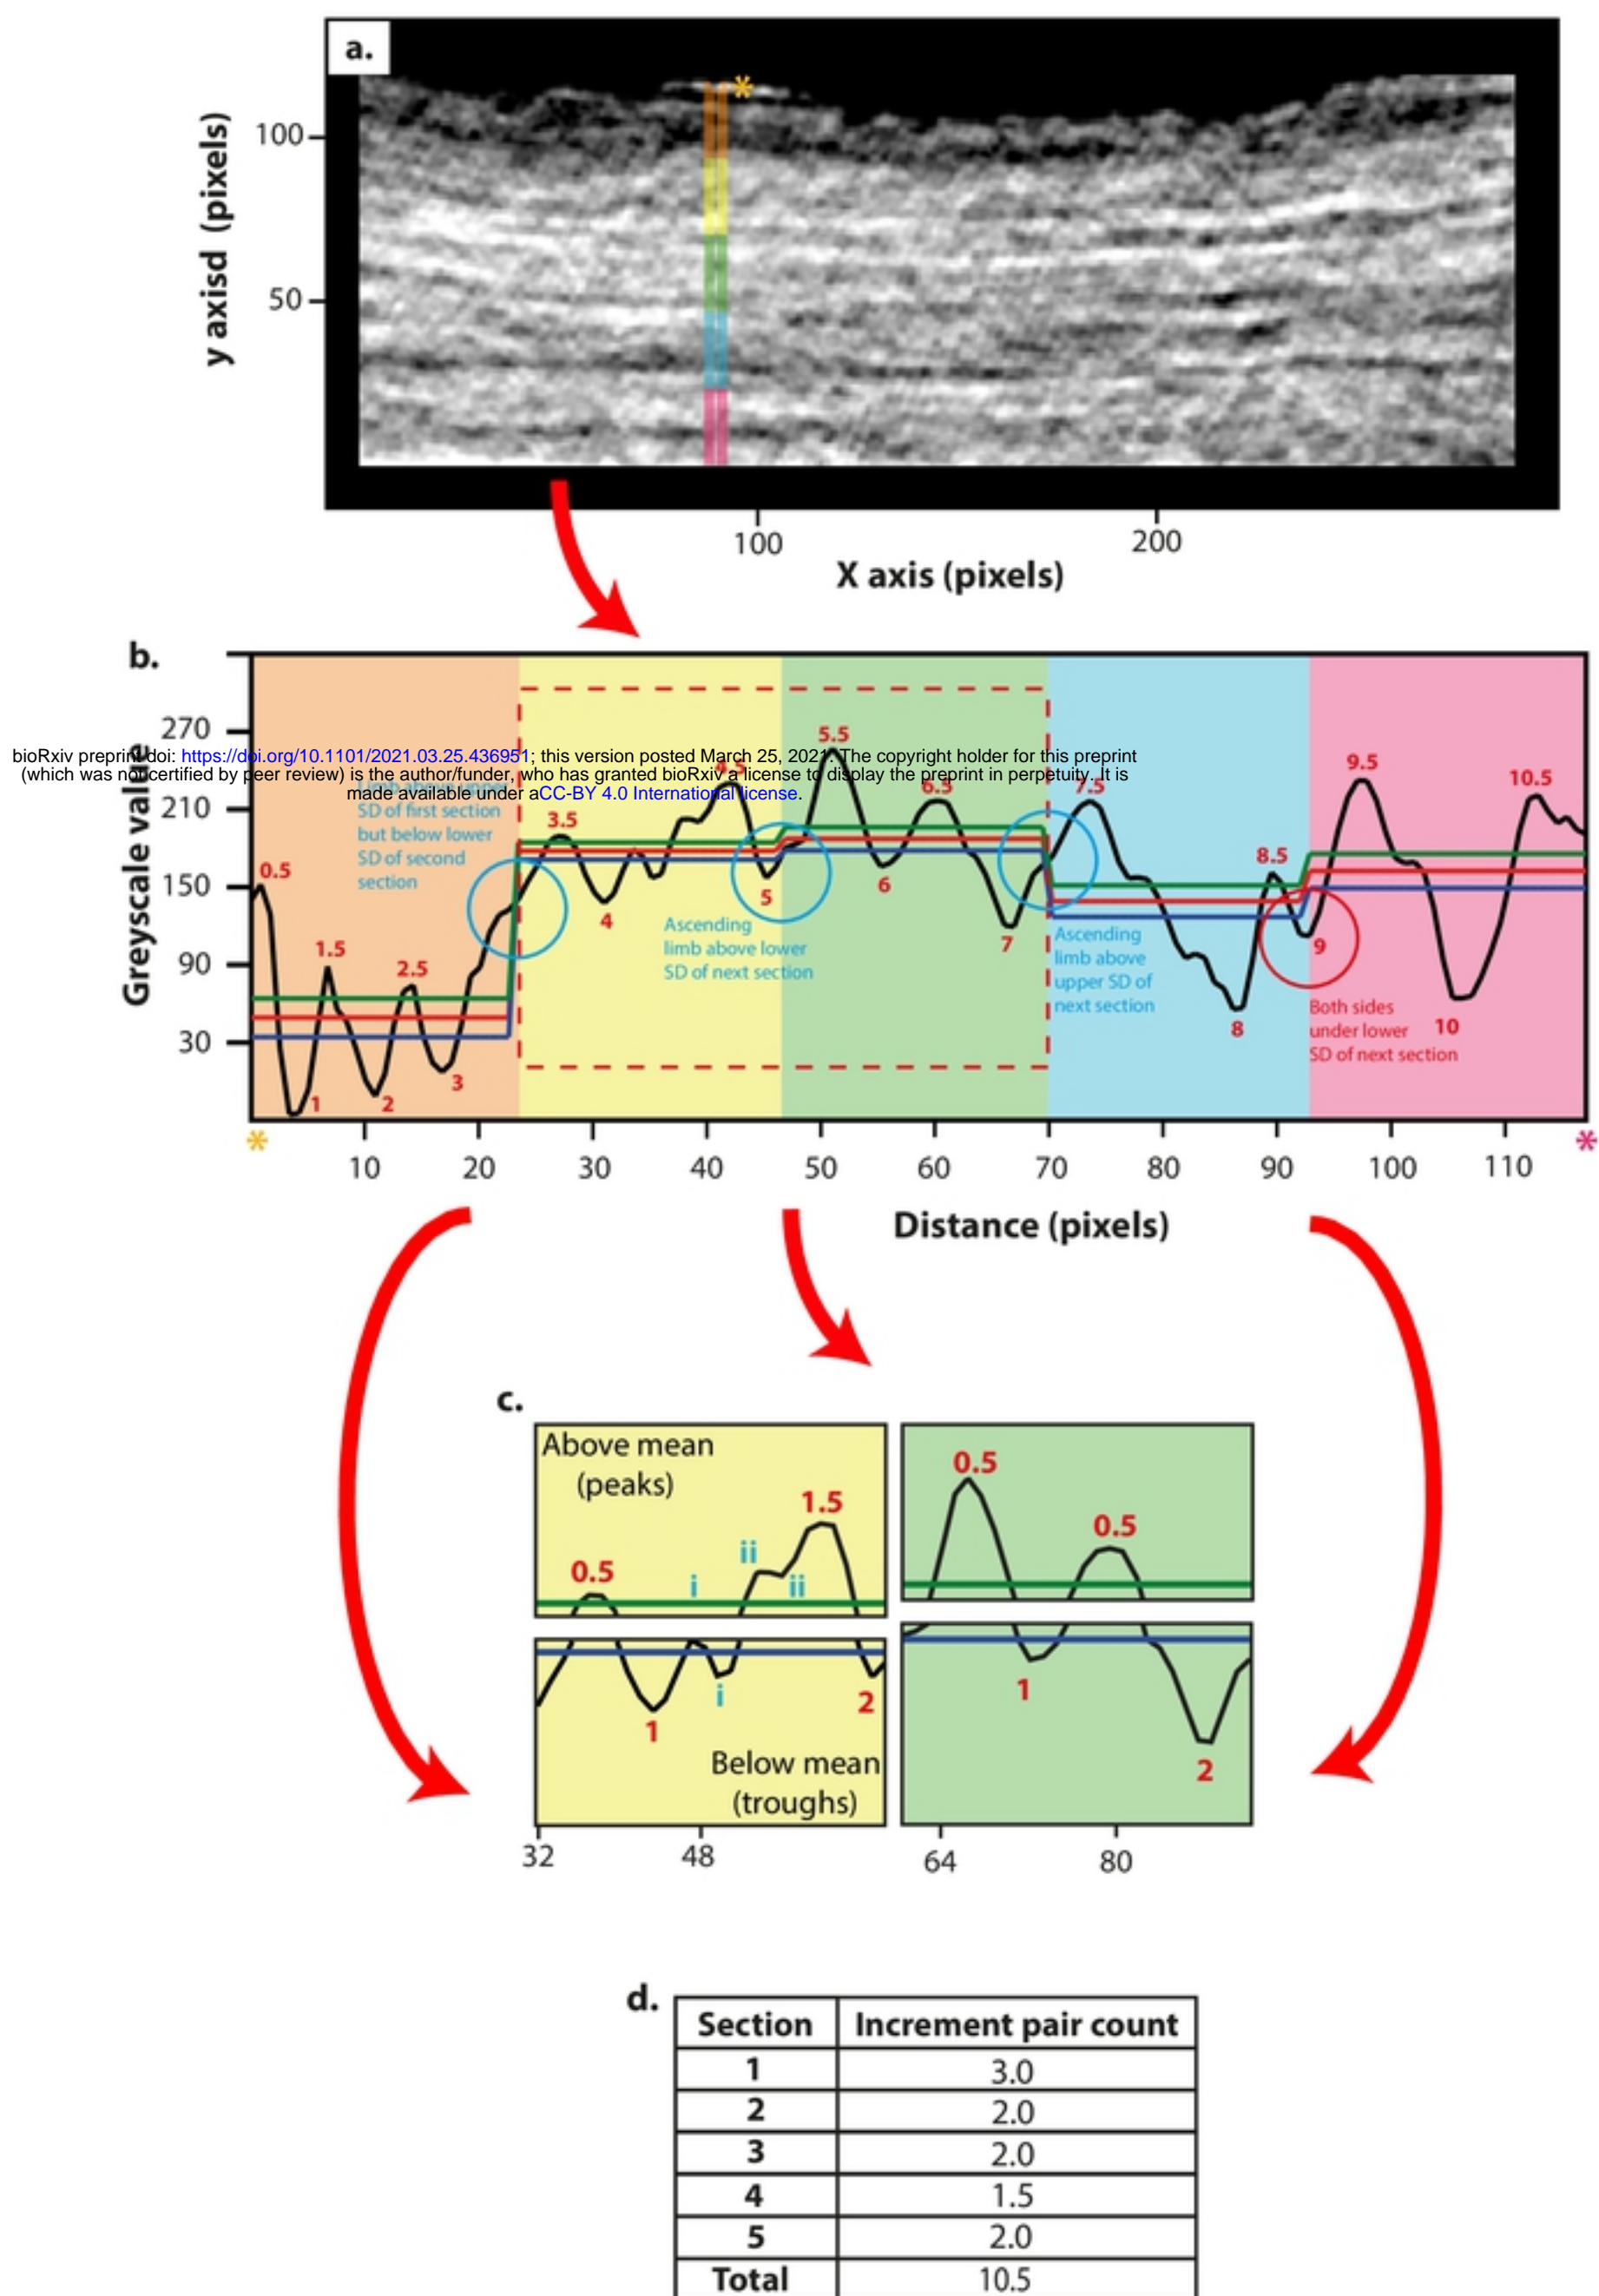



Figure 6.

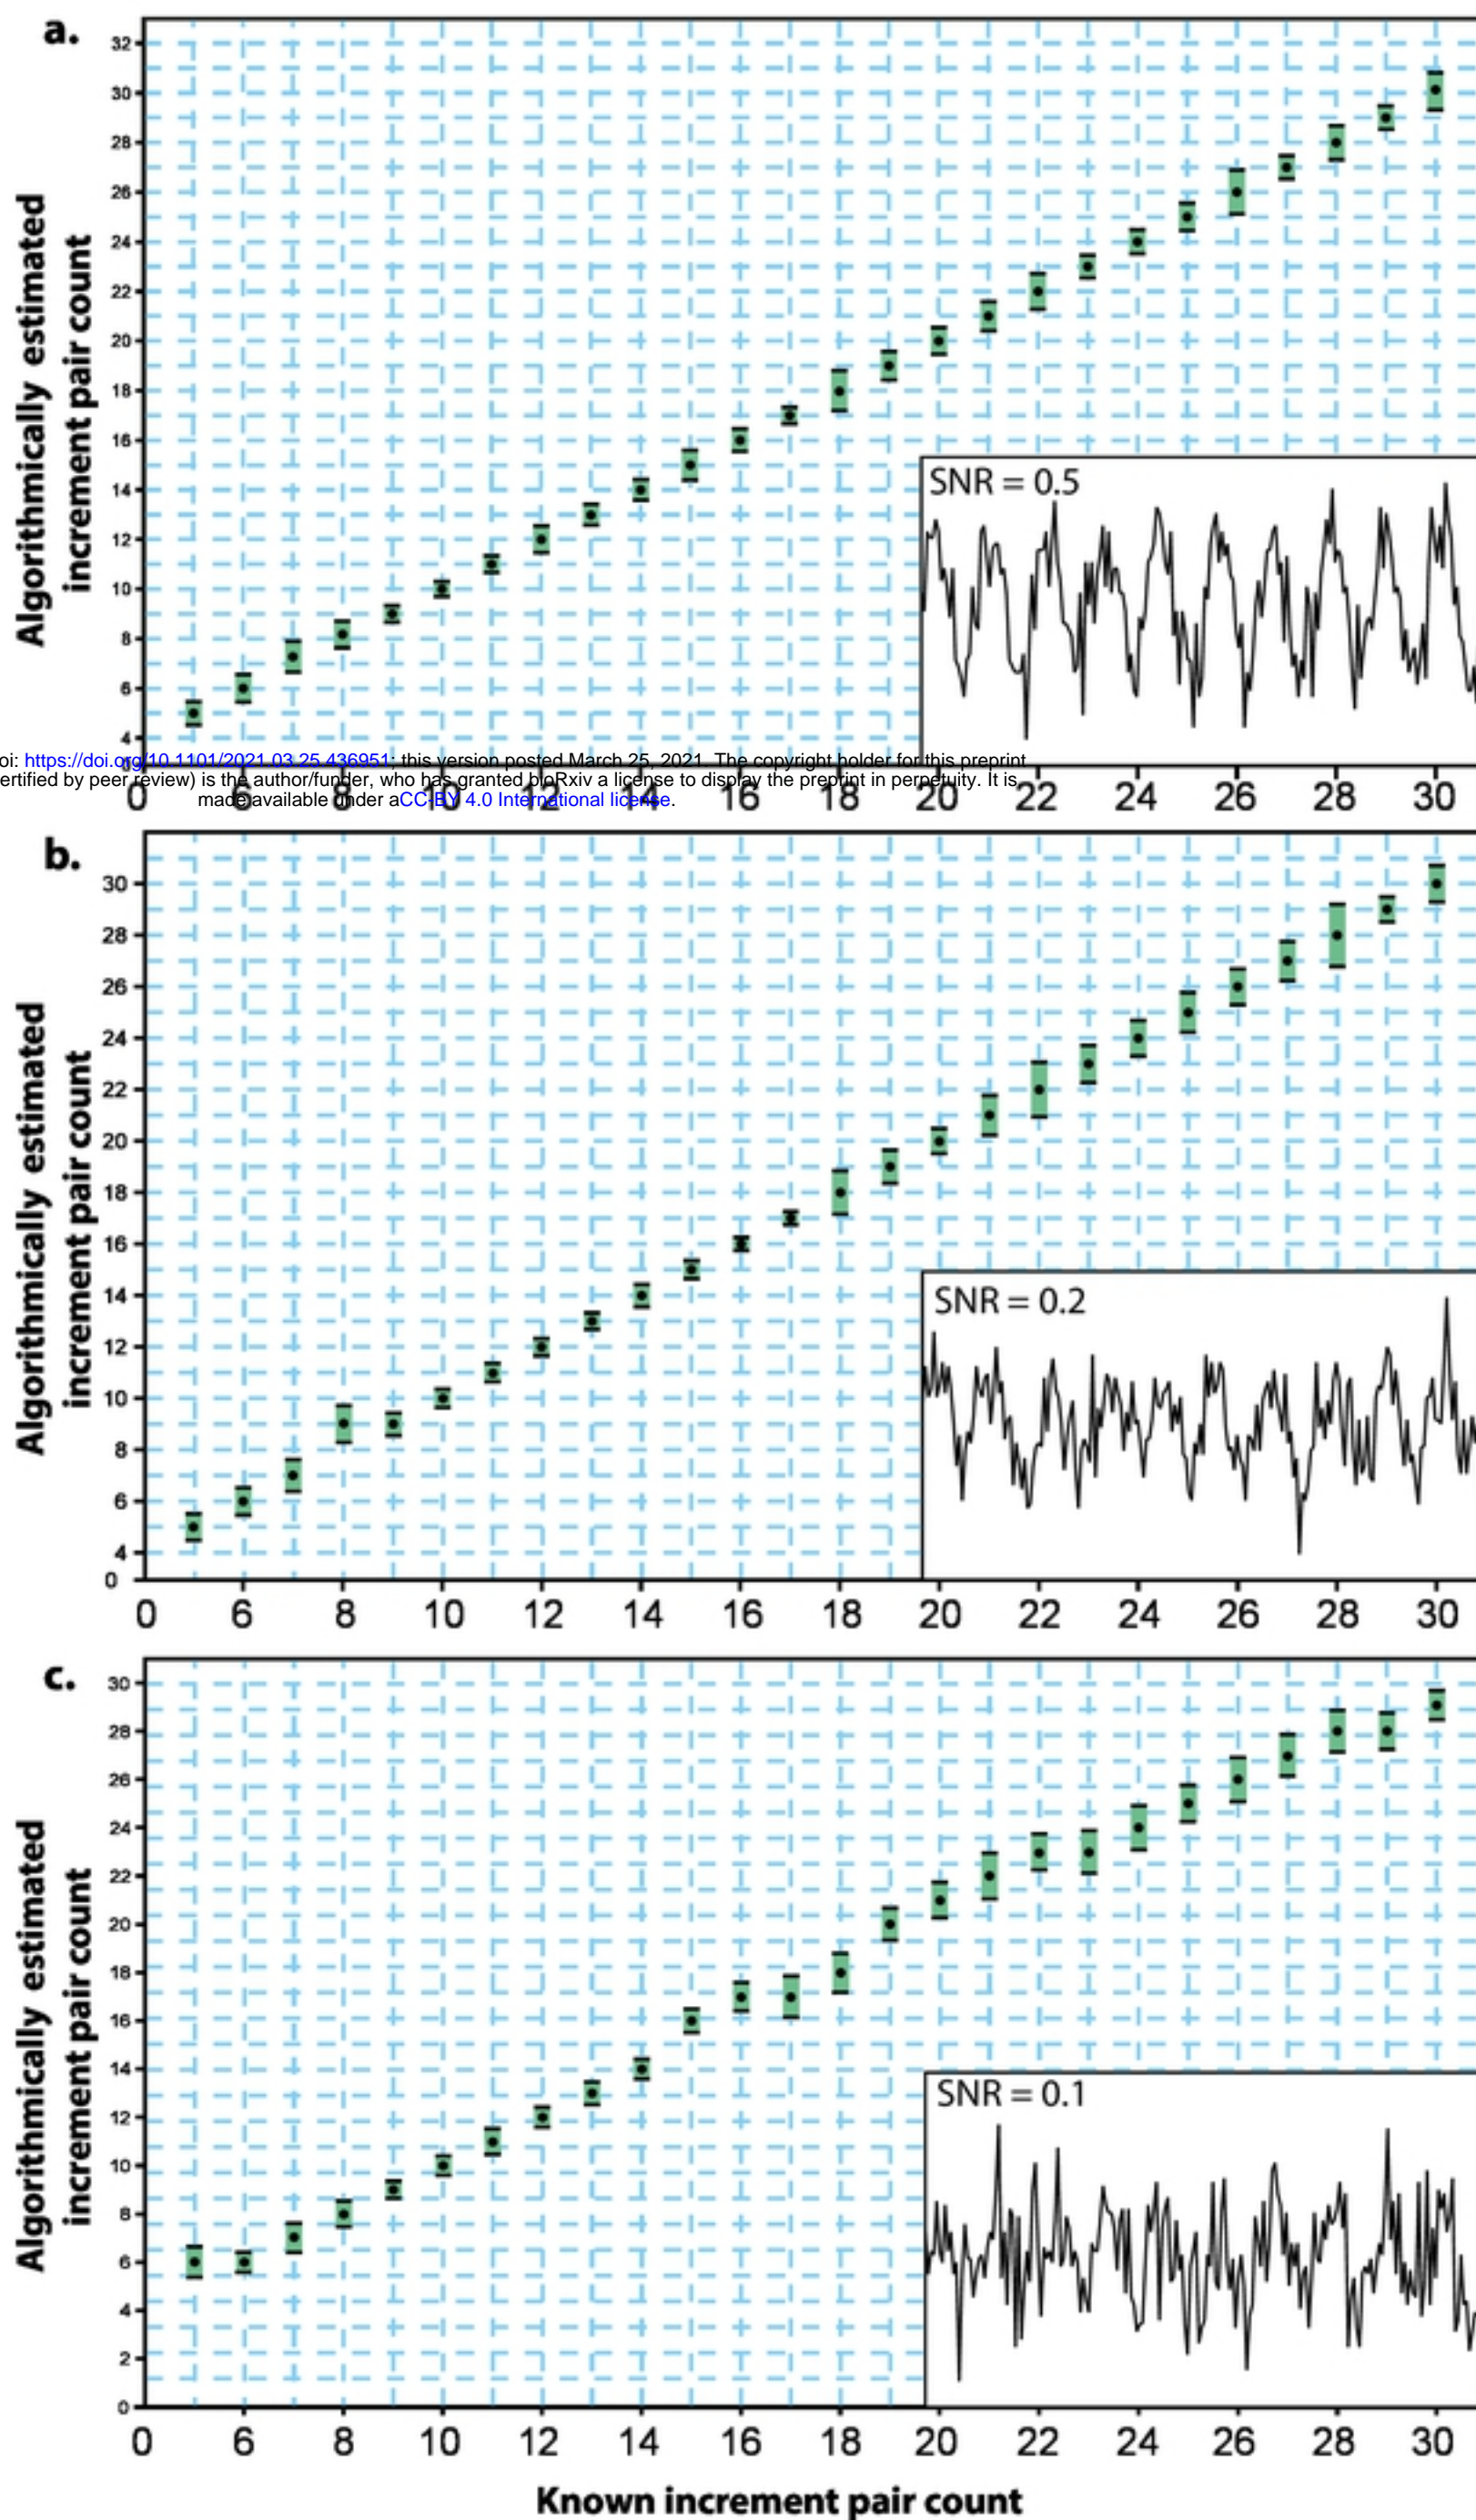

Figure 9.

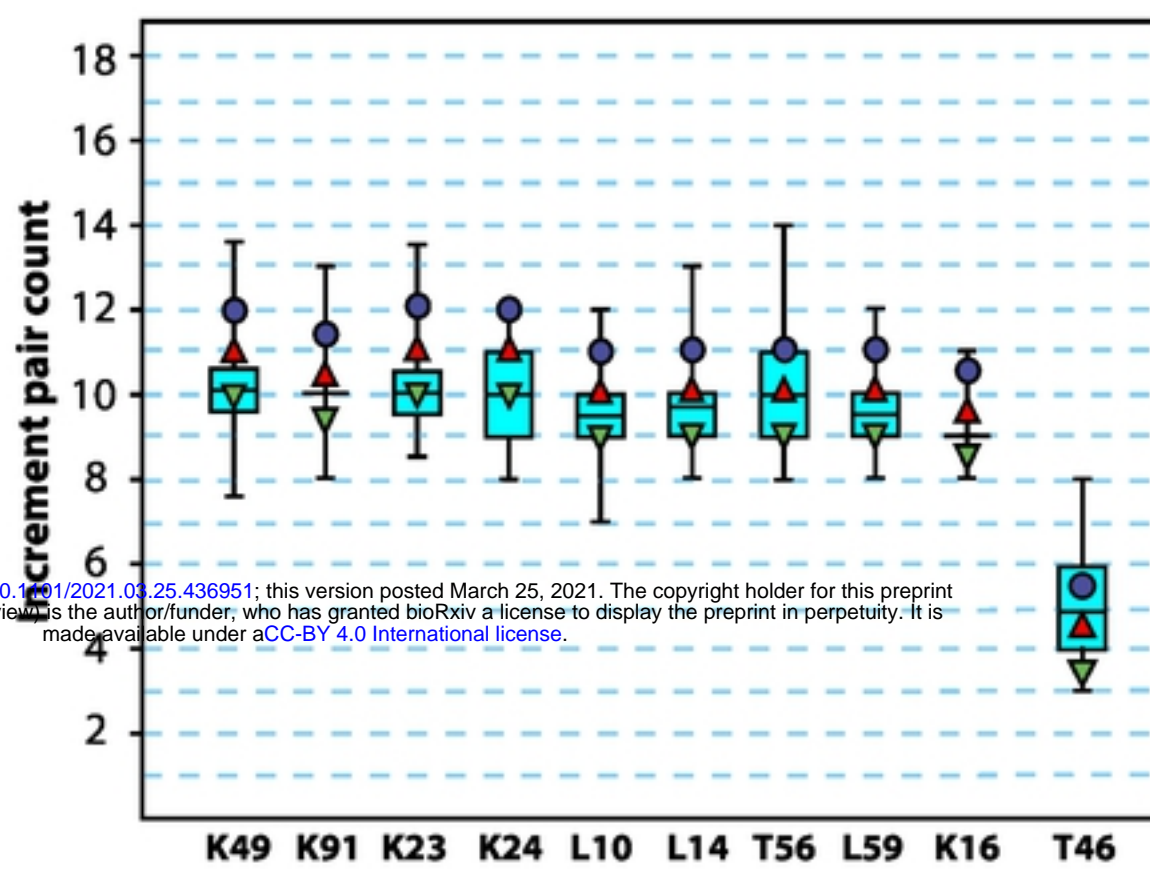

bioRxiv preprint doi: <https://doi.org/10.1101/2021.03.25.436951>; this version posted March 25, 2021. The copyright holder for this preprint (which was not certified by peer review) is the author/funder, who has granted bioRxiv a license to display the preprint in perpetuity. It is made available under aCC-BY 4.0 International license.



Figure 7.

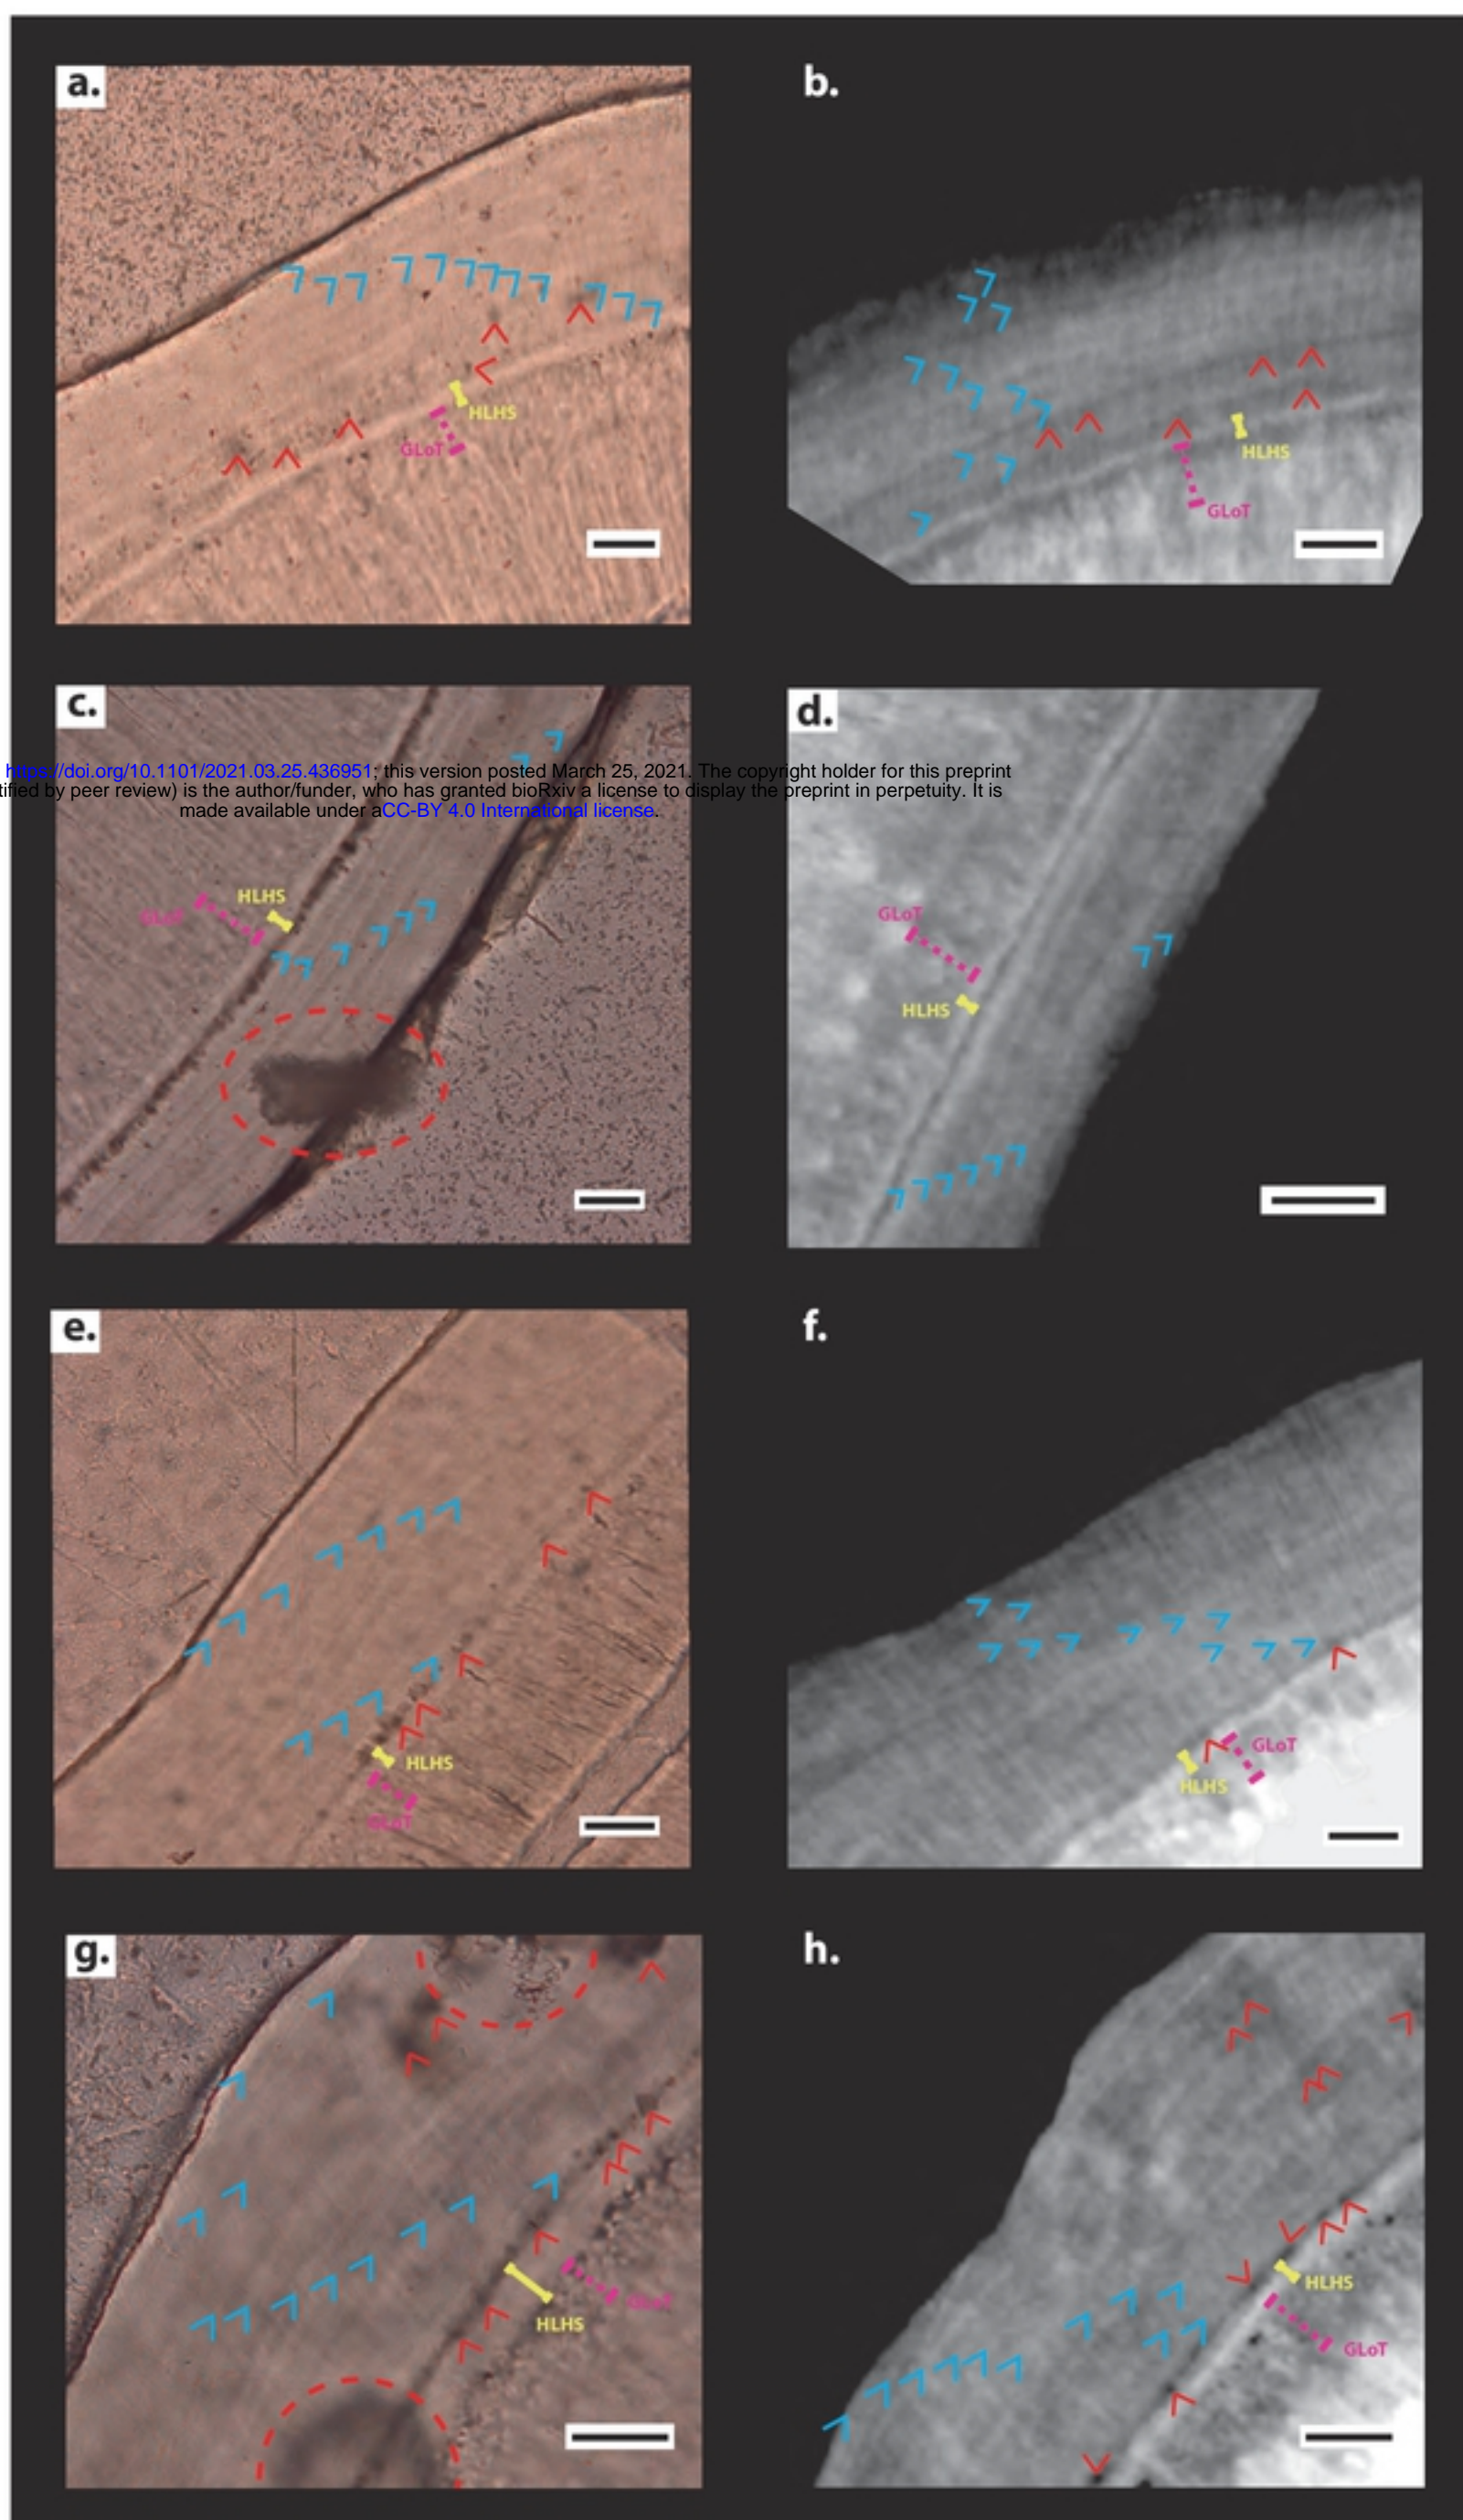

bioRxiv preprint doi: <https://doi.org/10.1101/2021.03.25.436951>; this version posted March 25, 2021. The copyright holder for this preprint (which was not certified by peer review) is the author/funder, who has granted bioRxiv a license to display the preprint in perpetuity. It is made available under aCC-BY 4.0 International license.
